# Supplementary material for: Spatially visualized single-cell pathology of highly multiplexed protein profiles in health and disease
Source: PubMed Central journal article supplement (PMC8160218; doi:10.1038/s42003-021-02166-2), 2021-05-27
Supplement: 42003_2021_2166_MOESM3_ESM.pdf [file 42003_2021_2166_MOESM3_ESM.pdf]

## Descriptions of Additional Supplementary Files

### **Supplementary Data 1**

**Description:** The csv files used in figure 2g-h and 3b-e.

### **Supplementary Movie 1**

**Description:** Movie shows the 3D visualization of the topographic map composed of Granzyme B, CD44, and pankeratin for sample DT2.

### **Supplementary Movie 2**

**Description:** Movie shows the 3D visualization of the topographic map composed of Granzyme B, CD44, and pankeratin for sample DT3.

### **Supplementary Movie 3**

**Description:** Movie shows the 3D visualization of the topographic map composed of Granzyme B, CD44, and pankeratin for sample NT1.

### **Supplementary Movie 4**

**Description:** Movie shows the 3D visualization of the topographic map composed of Granzyme B, CD44, and pankeratin for sample NT3.
