# Supplementary material for: Spatially visualized single-cell pathology of highly multiplexed protein profiles in health and disease
Source: Commun Biol. 2021 May 27;4:632. doi: 10.1038/s42003-021-02166-2 (PMC8160218; doi:10.1038/s42003-021-02166-2)
Supplement: Supplementary file 2 — Supplementary Information [file 42003_2021_2166_MOESM2_ESM.pdf]

## **Supplementary Information**

# **Spatially visualized single-cell pathology of highly multiplexed protein profiles in health and disease**

Mayar Allam<sup>1,#</sup>, Thomas Hu<sup>1,2,#</sup>, Shuangyi Cai<sup>1</sup>, Krishnan Laxminarayanan<sup>3</sup>, Robert B. Hughley<sup>3</sup>, and Ahmet F. Coskun<sup>1,3,4\*</sup>

<sup>1</sup> Wallace H. Coulter Department of Biomedical Engineering, Georgia Institute of Technology and Emory University, Atlanta, GA, USA.

<sup>2</sup> School of Electrical and Computer Engineering, Georgia Institute of Technology, Atlanta, GA, USA.

<sup>3</sup> Parker H. Petit Institute for Bioengineering and Bioscience, Georgia Institute of Technology, 315 Ferst Dr. NW, Atlanta, GA 30332

<sup>4</sup> Interdisciplinary Bioengineering Graduate Program, Georgia Institute of Technology, Atlanta, GA, USA.

#These authors contributed equally \*Corresponding author

Ahmet F. Coskun, Ph.D. ([ahmet.coskun@bme.gatech.edu](mailto:ahmet.coskun@bme.gatech.edu))

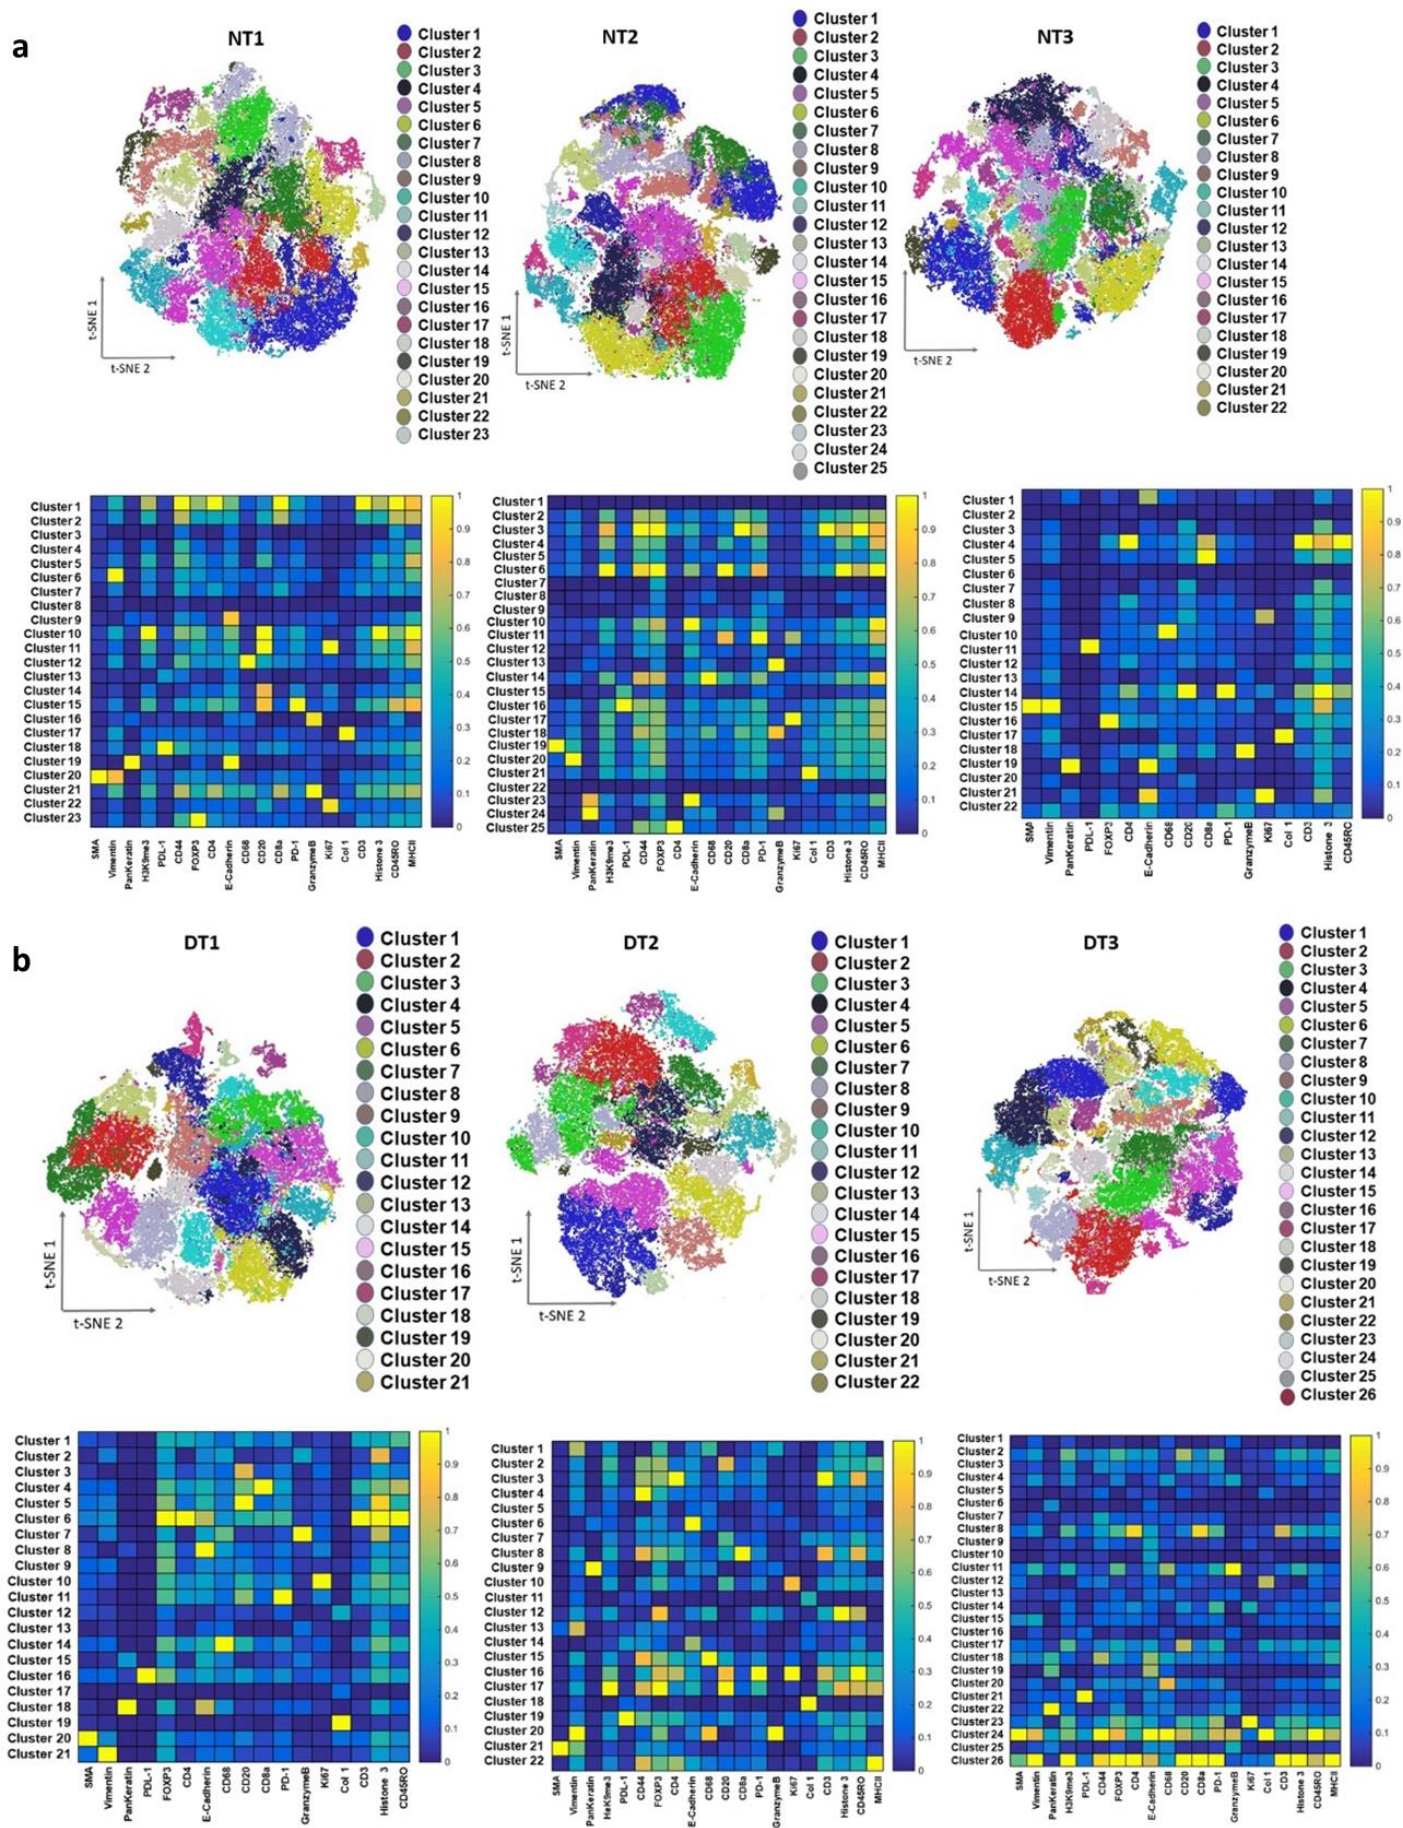

**Supplementary Figure 1. PhenoGraphs of normal and diseased tonsils reveal the heterogeneity of markers distribution.**

**a** PhenoGraphs of all three normal ROIs showed all clusters' distribution and associated heatmaps that exhibited marker expressions in each cluster.

**b** PhenoGraphs of all three diseased ROIs demonstrated the distribution of all clusters and their related heatmaps that showed the marker expressions in each cluster.

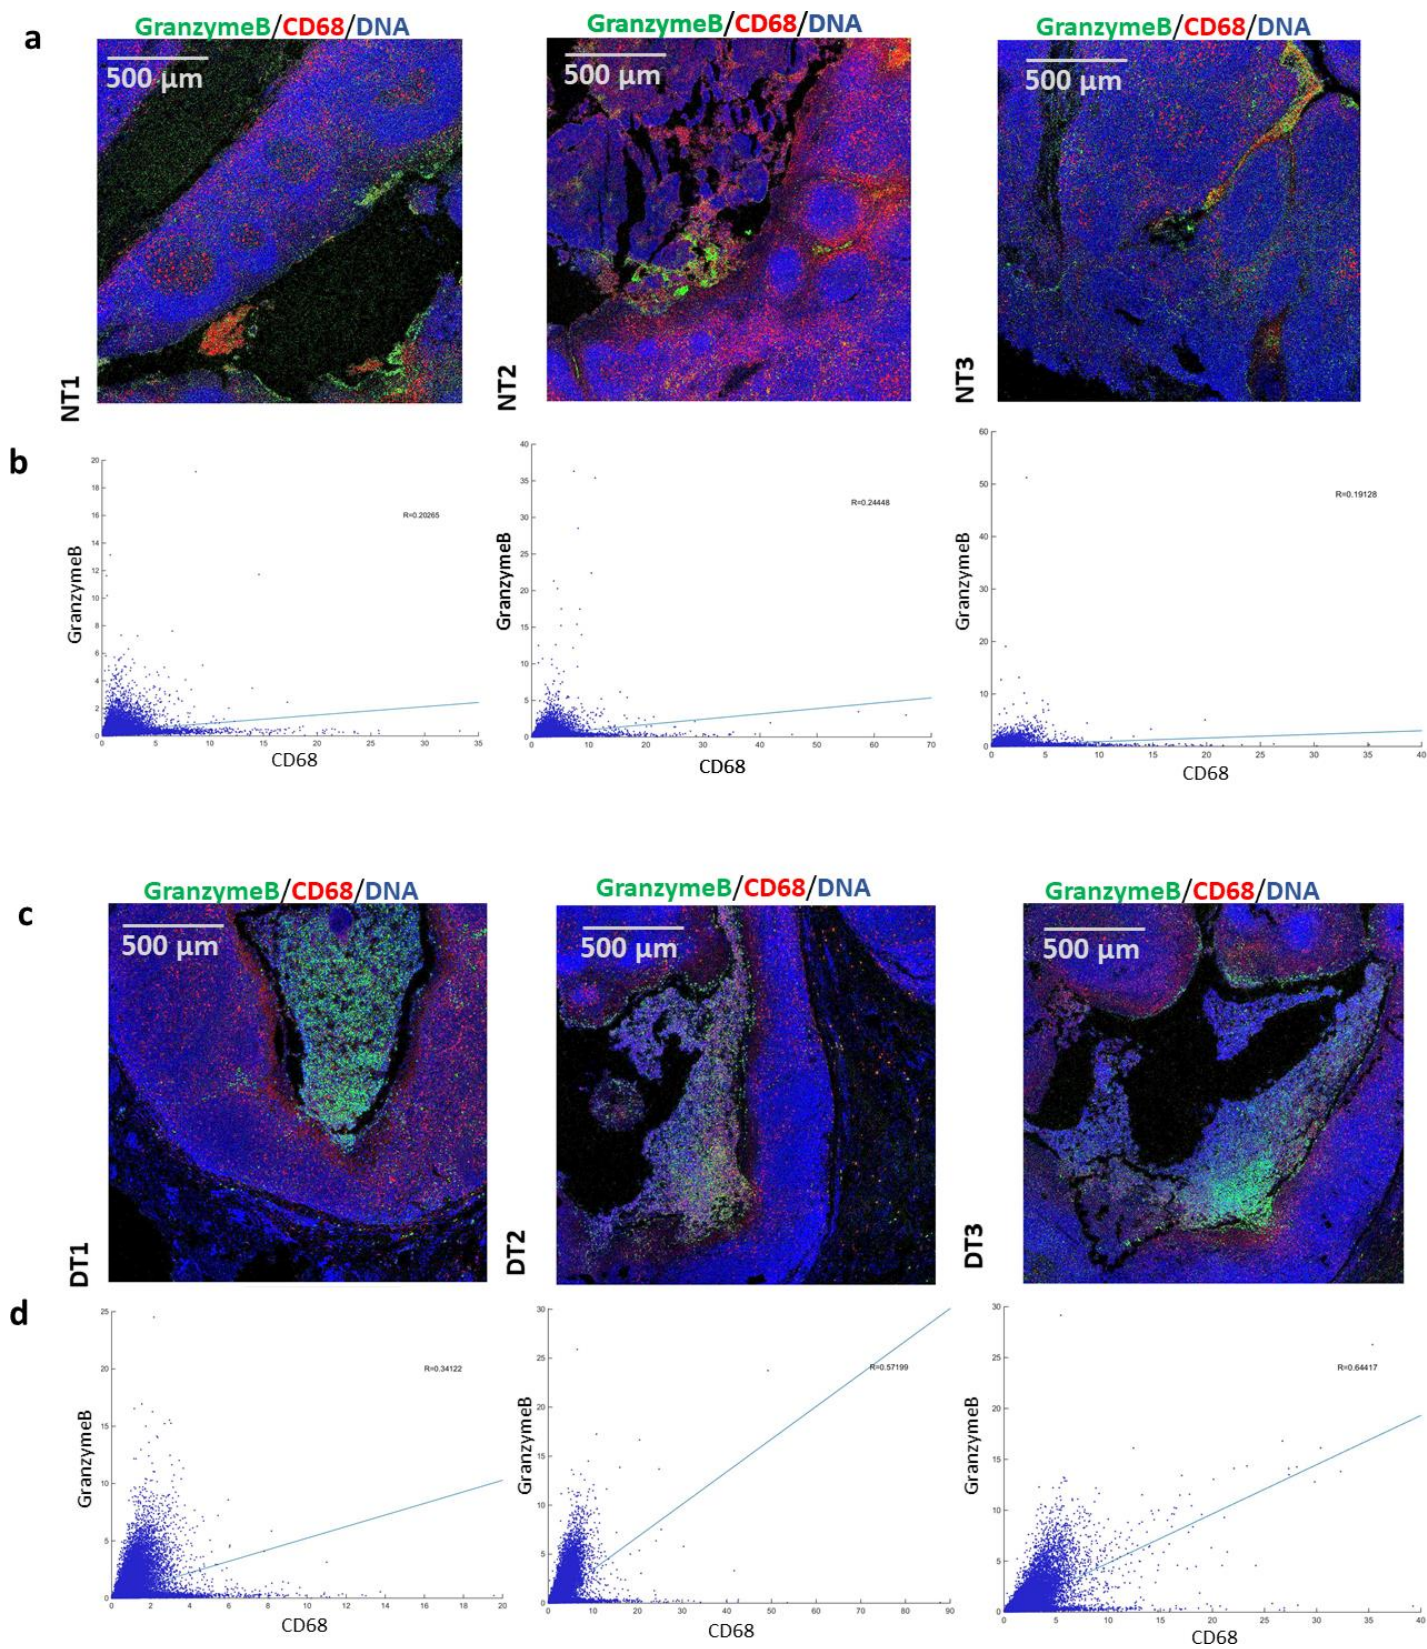

**Supplementary Figure 2. CD68+ cells are associated with Granzyme B expression in response to infection in the diseased tonsil.**

- a** Visual representation showed the co-expression of granzyme B and CD68 across three normal tonsils ROIs.
- b** Correlation analysis between granzyme B and CD68 at the single-cell level across three normal tonsils ROIs was presented. Pearson's correlation coefficient was found to be  $R = 0.20265$  for NT1,  $R = 0.24448$  for NT2, and  $0.19128$  for NT3.
- c** Visual representation demonstrated the co-expression of granzyme B and CD68 across three diseased tonsils ROIs.
- d** Correlation analysis between granzyme B and CD68 at the single-cell level across three diseased tonsils ROIs was shown. Pearson's correlation coefficient was found to be  $R = 0.34122$  for DT1,  $R = 0.57199$  for DT2, and  $0.64417$  for DT3.

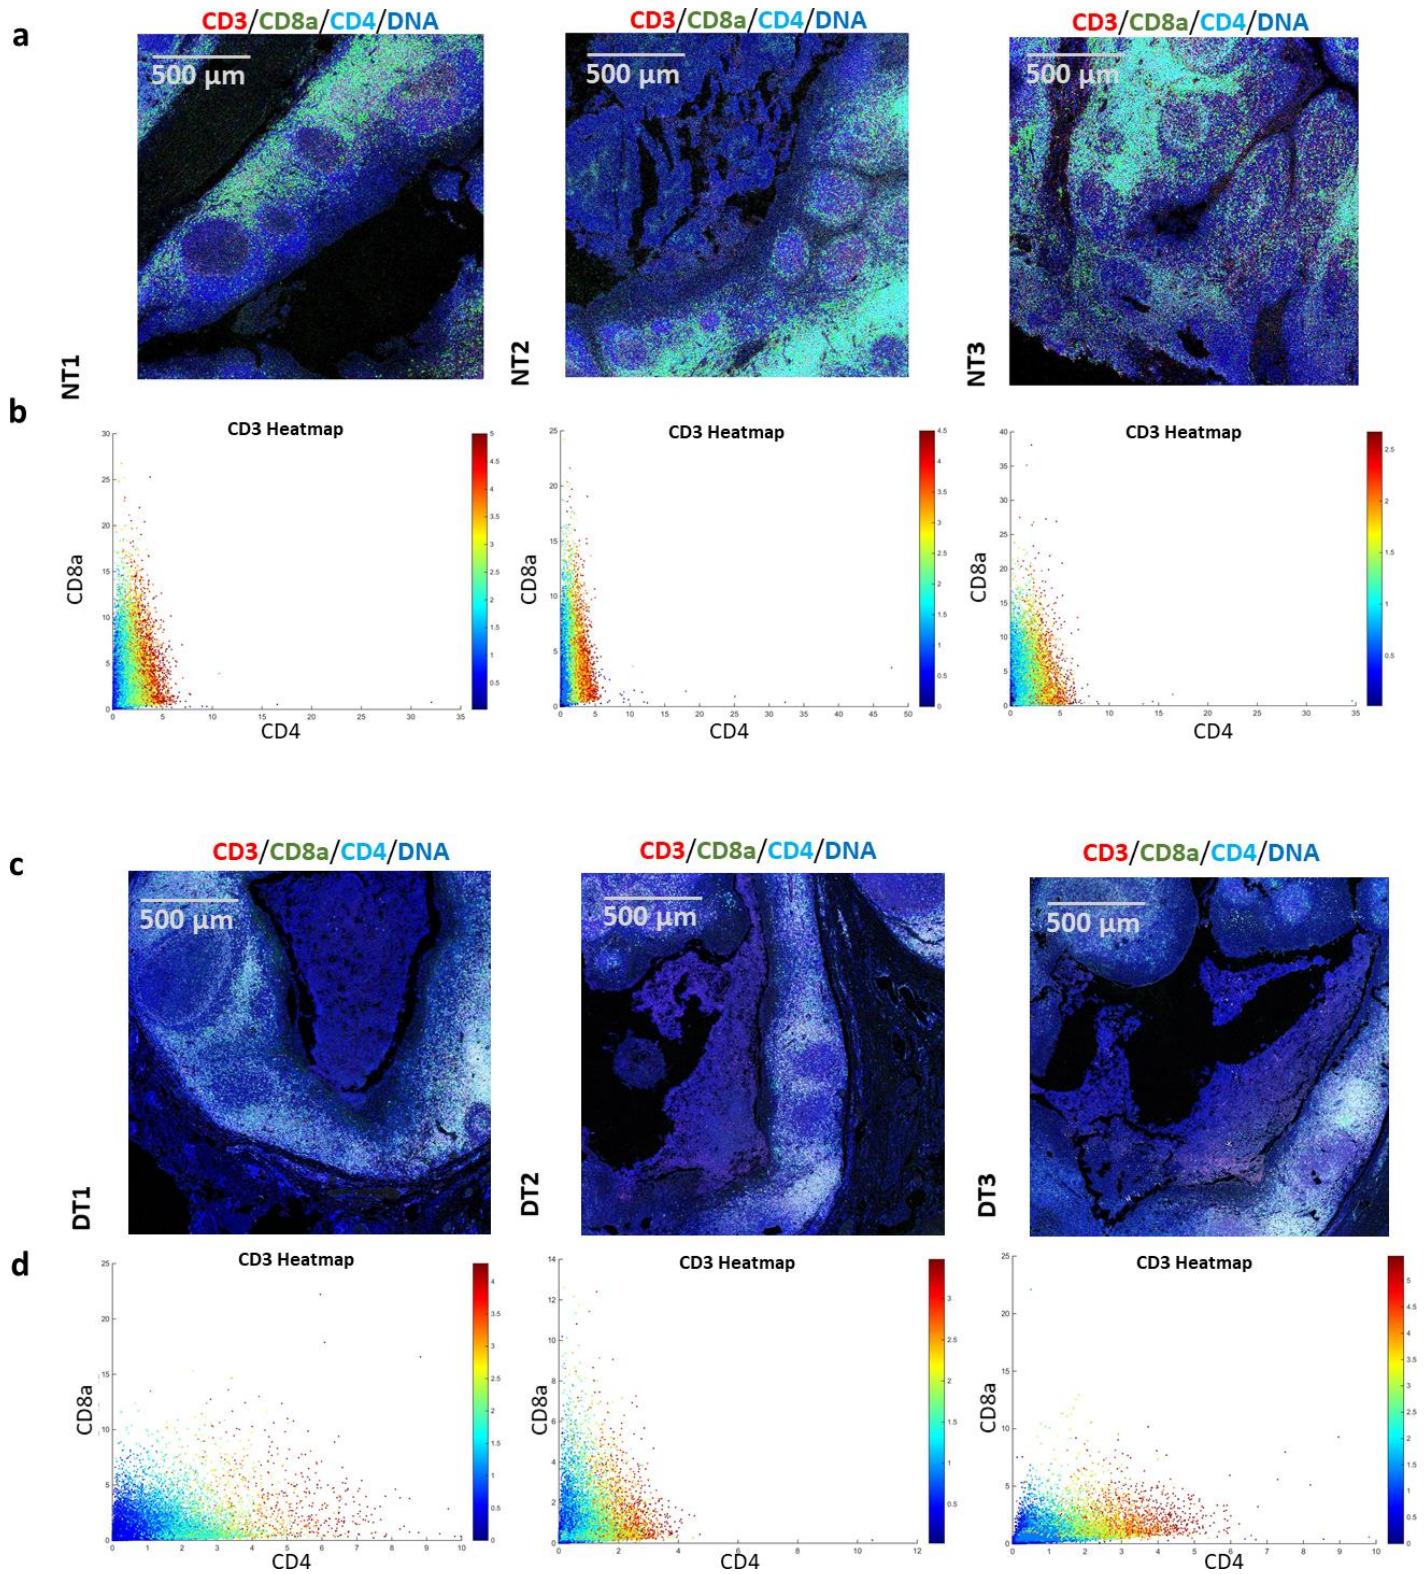

### **Supplementary Figure 3. CD3+ cells preferentially co-express CD4 in response to infection**

- a** Visual representation showed the co-expression of CD3, CD4, CD8a across three normal tonsils ROIs.
- b** Correlation analysis between CD4 and CD8a with CD3 heatmap across three normal tonsils ROIs was demonstrated.
- c** Visual representation provided the co-expression of CD3, CD4, CD8a across three diseased tonsils ROIs.
- d** Correlation analysis between CD4 and CD8a with CD3 heatmap across three diseased tonsils ROIs was provided.

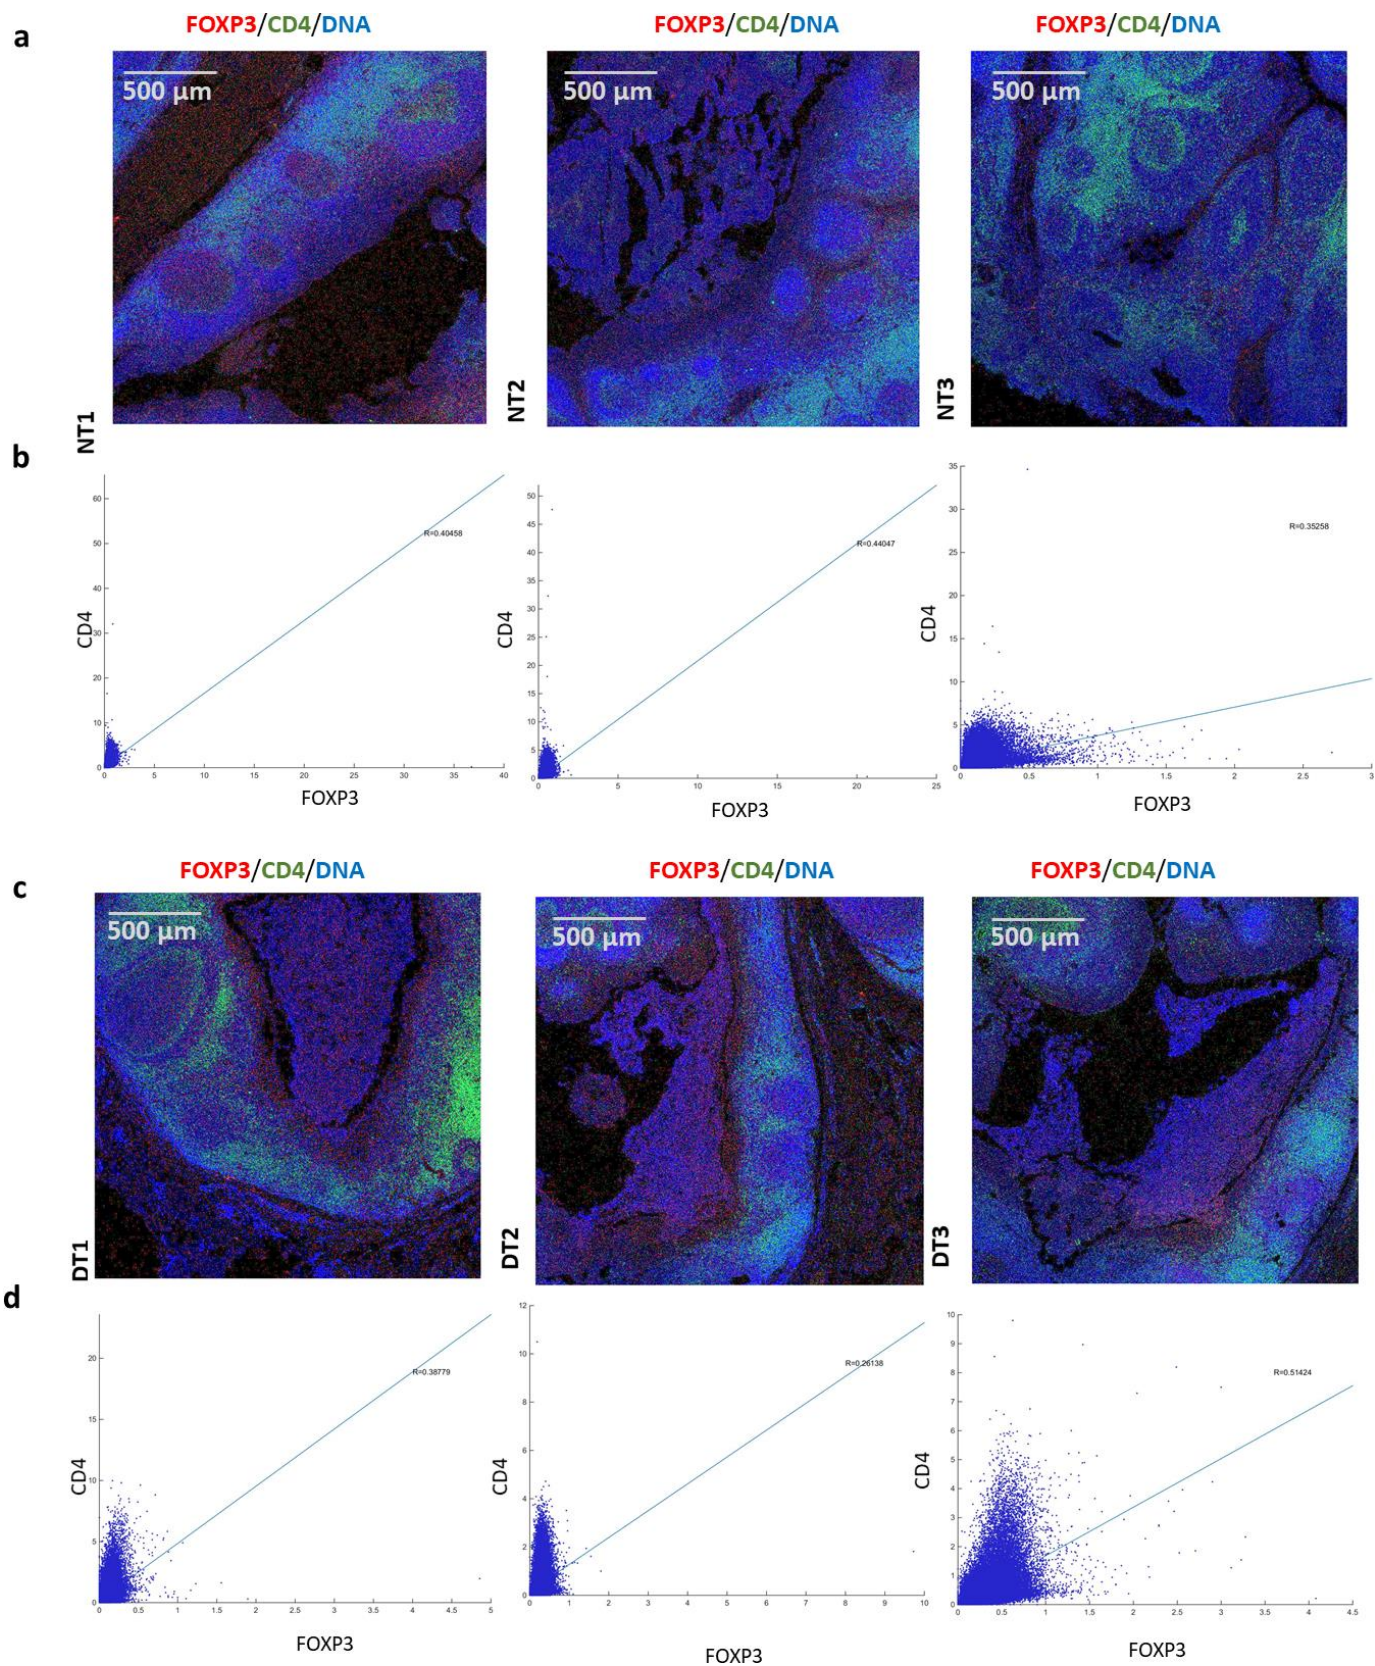

#### **Supplementary Figure 4. FOXP3+ cells Treg cells are a subset of CD4+ cells**

**a** Visual representation demonstrated the co-expression of CD4 and FOXP3 in all three normal ROIs.

**b** Correlation analysis between CD4 and FOXP3 in all three normal ROIs was shown. Pearson's correlation coefficient was found to be  $R = 0.40458$  for NT1,  $R = 0.44047$  for NT2, and  $R = 0.35258$  for NT3.

**c** Visual representation showed the co-expression of CD4 and FOXP3 in all three diseased ROIs

**d** Correlation analysis between CD4 and FOXP3 in all three diseased ROIs was presented. Pearson's correlation coefficient was found to be  $R = 0.38779$  for DT1,  $R = 0.20138$  for DT2, and  $R = 0.51424$  for DT3.

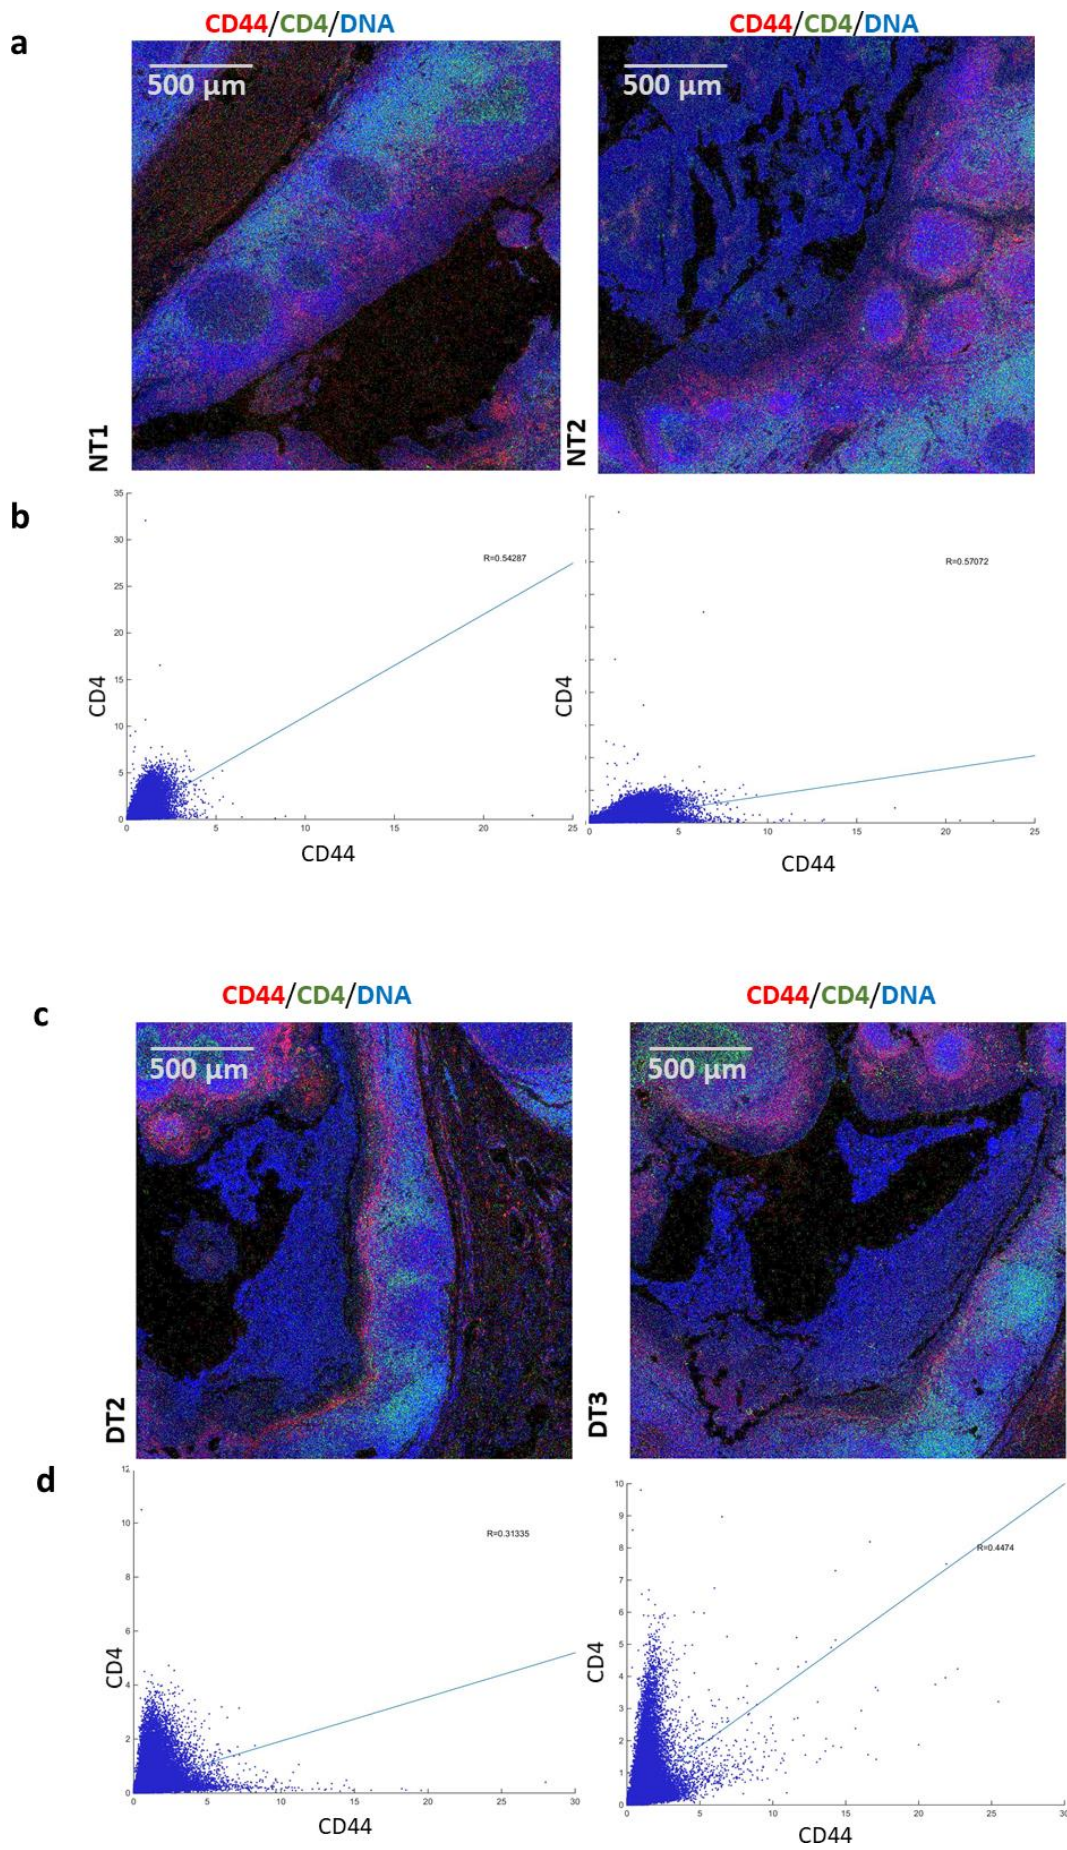

### **Supplementary Figure 5. CD44+ cells Treg cells are a subset of CD4+ cells**

**a** Visual representation demonstrated the co-expression of CD4 and CD44 in all three normal ROIs.

**b** Correlation analysis between CD4 and CD44 in all three normal ROIs was presented. Pearson's correlation coefficient was found to be  $R = 0.54287$  for NT1, and  $R = 0.57072$  for NT2.

**c** Visual representation indicated the co-expression of CD4 and CD44 in all three diseased ROIs.

**d** Correlation analysis between CD4 and CD44 in all three diseased ROIs was shown. Pearson's correlation coefficient was found to be  $R = 0.31335$  for DT2, and  $R = 0.4474$  for DT3.

**a**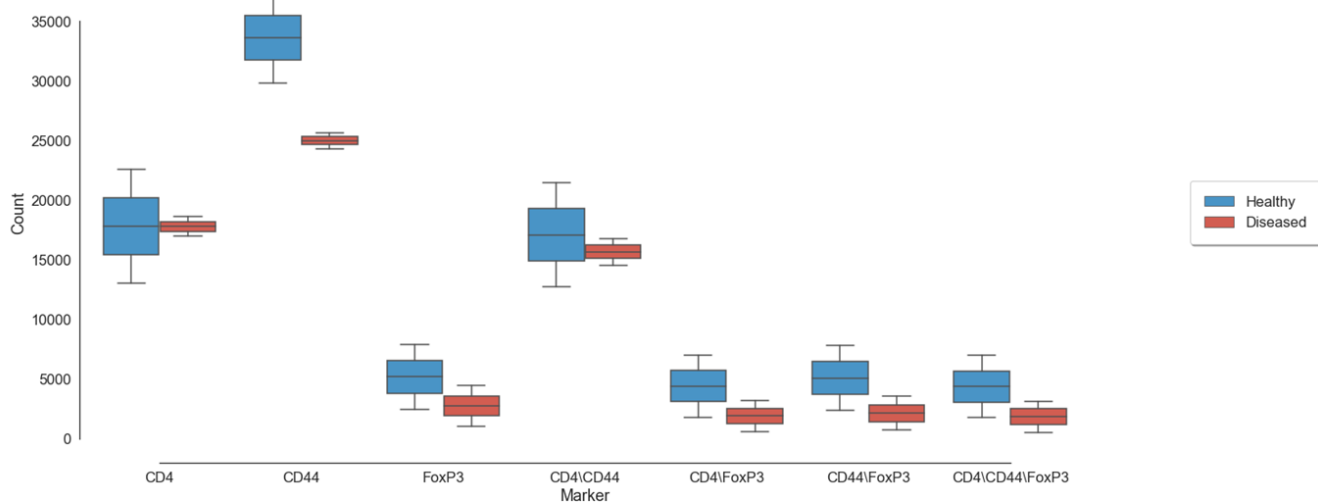**b**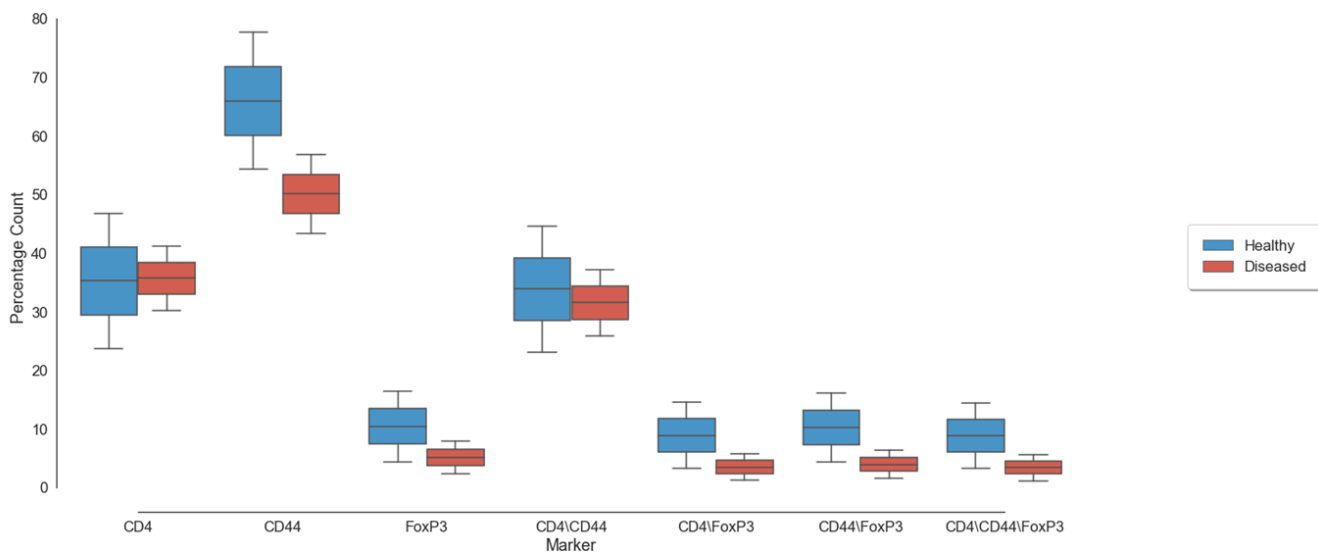

**Supplementary Figure 6. Treg cells were more active in the normal tonsil compared to diseased tonsil**

**a** Box plot quantified the count of cells with positive staining with either CD4, FoxP3, CD44 alone, or different combinations to account for different regulatory T-cell phenotypes. Box plots show median first and third quartile, minimum and maximum (excluding outliers).

**b** Box plot indicated the percentage of cells in the ROIs with positive staining with either CD4, FoxP3, CD44 alone, or various combinations to account for different regulatory T-cell phenotypes. Box plots show median first and third quartile, minimum and maximum (excluding outliers).

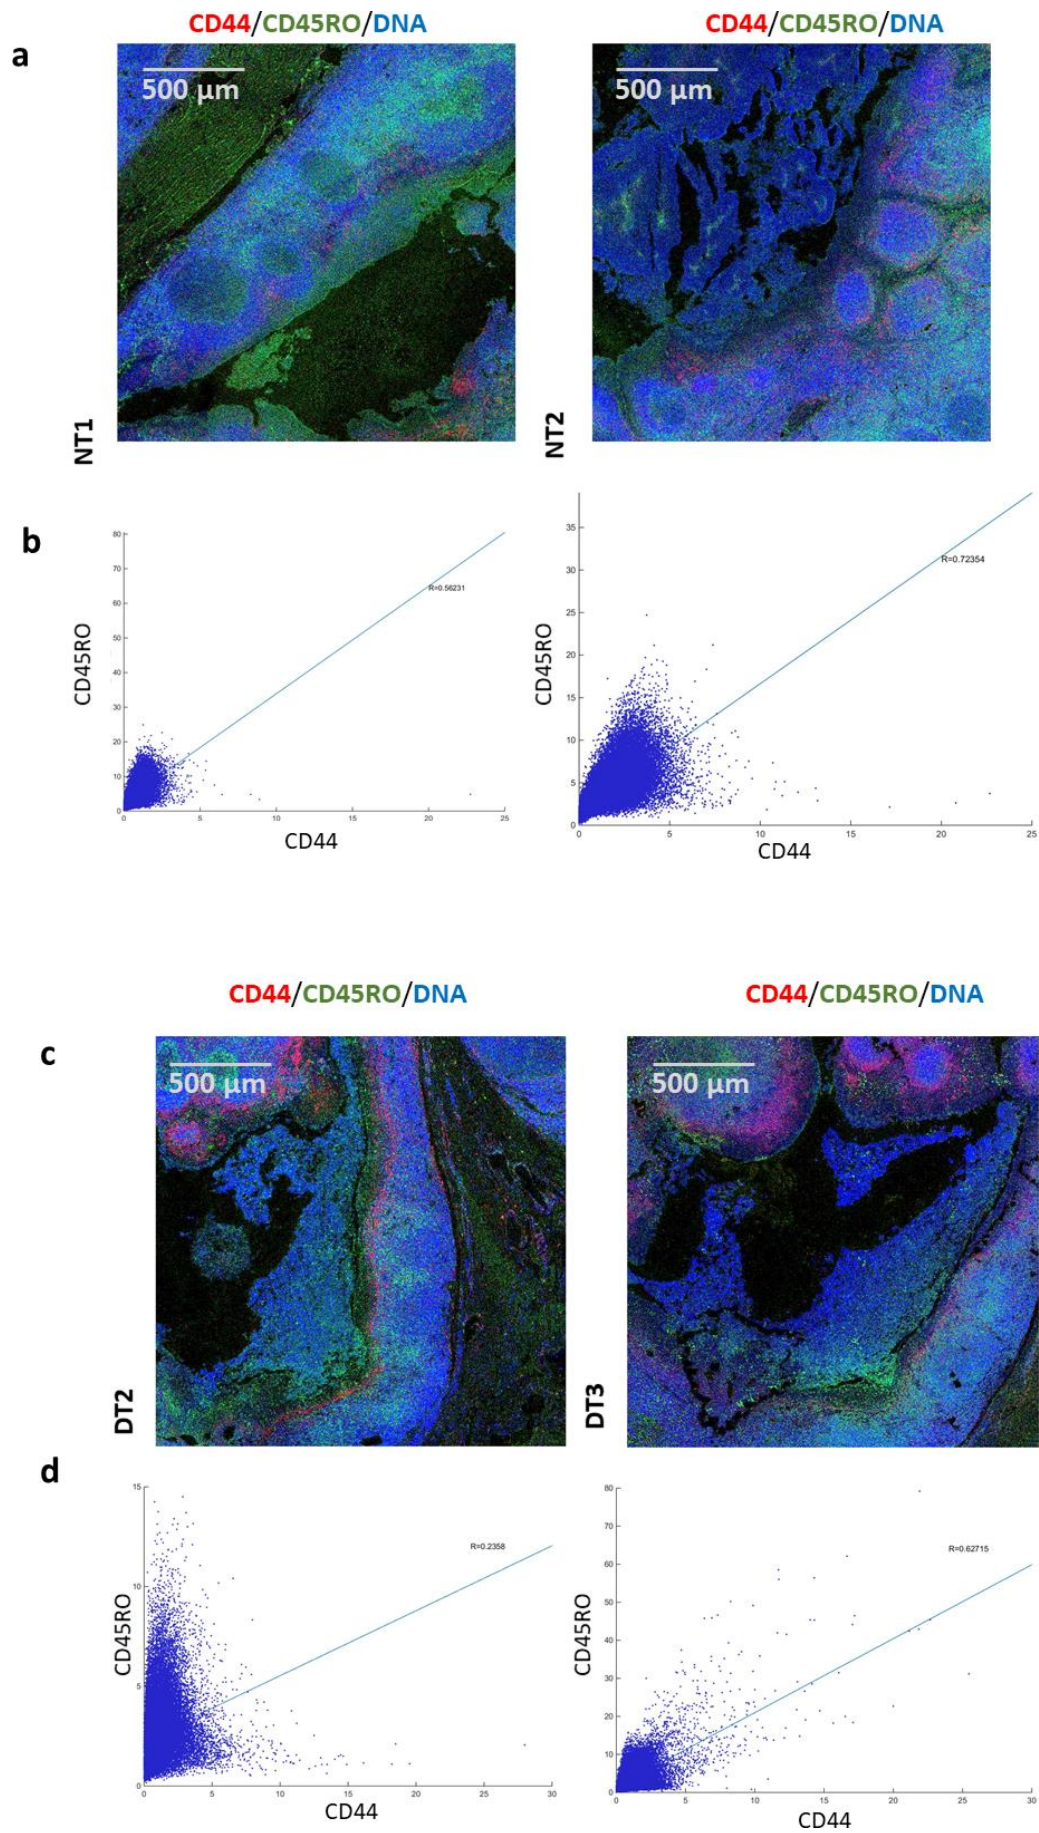

**Supplementary Figure 7. Treg cells exhibited a memory phenotype.**

- a** Visual representation showed the co-expression of CD44 and CD45RO across 3 ROIs of the normal tonsil.
- b** Correlation analysis between CD44 and CD45RO across 3 ROIs of the normal tonsil was presented. Pearson's correlation coefficient was found to be  $R = 0.56231$  for NT1, and  $R = 0.72354$  for NT2.
- c** Visual representation demonstrated the co-expression of CD44 and CD45RO across 3 ROIs of the diseased tonsil.
- d** Correlation analysis between CD44 and CD45RO across 3 ROIs of the diseased tonsil was shown. Pearson's correlation coefficient was found to be  $R = 0.2358$  for DT2, and  $R = 0.62715$  for DT3.

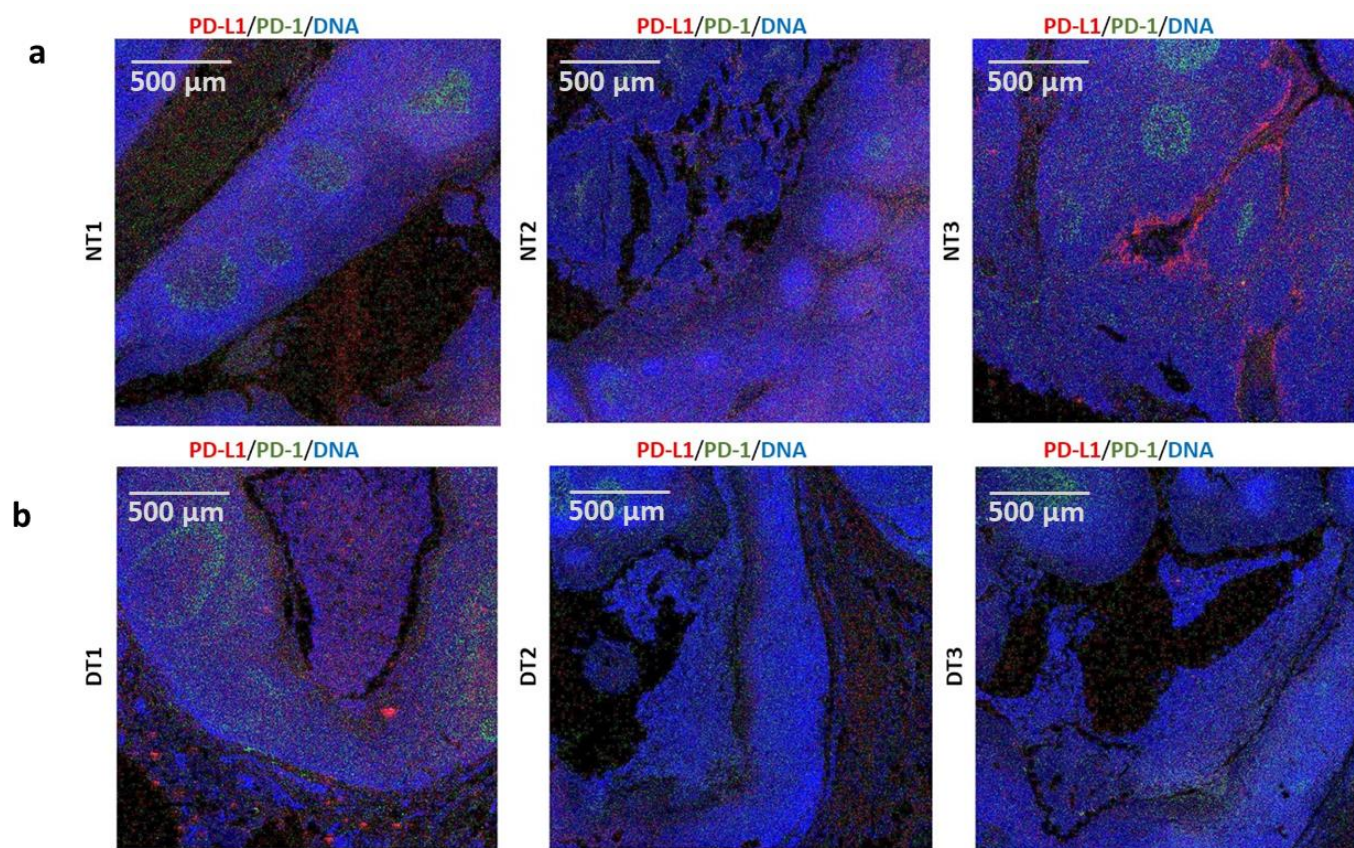

**Supplementary Figure 8. PD-1 expressions were co-localized in the germinal centers**

- a** Visual representation presented the co-expression of PD-1 and PD-L1 in all normal ROIs.
- b** Visual representation demonstrated the co-expression of PD-1 and PD-L1 in all diseased ROIs.

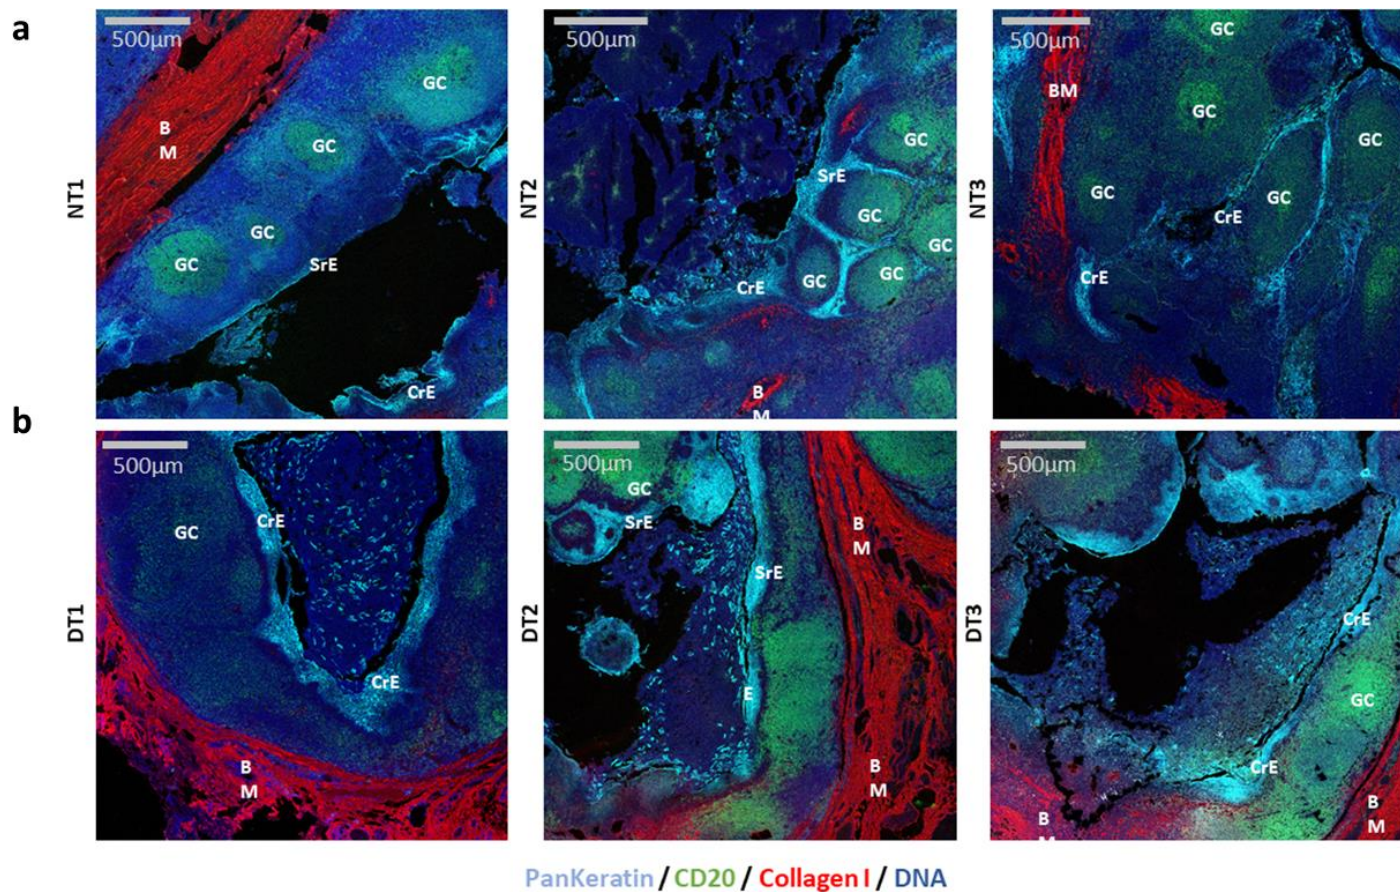

**Supplementary Figure 9. Representative figures of normal and diseased tonsil tissues showed distinct anatomical regions.**

**a** Representative composite of all regions of interest (ROIs) chosen for analysis in the normal and (b) diseased conditions was shown. BM (Basement membrane), GC (Germinal Center), and E (Epithelial cells) were denoted on each image. The continuous expression of collagen type 1 (shown in red) was used to identify the basement membrane, whereas PanKeratin (shown in cyan) was utilized to determine the epithelial cell layer. CD20 (shown in green) was used to identify the germinal center where B cells resided. The epithelial layer was further divided into SrE (stromal Epithelium) or (CrE) Crypt Epithelium, depending on the epithelial layer's continuity.

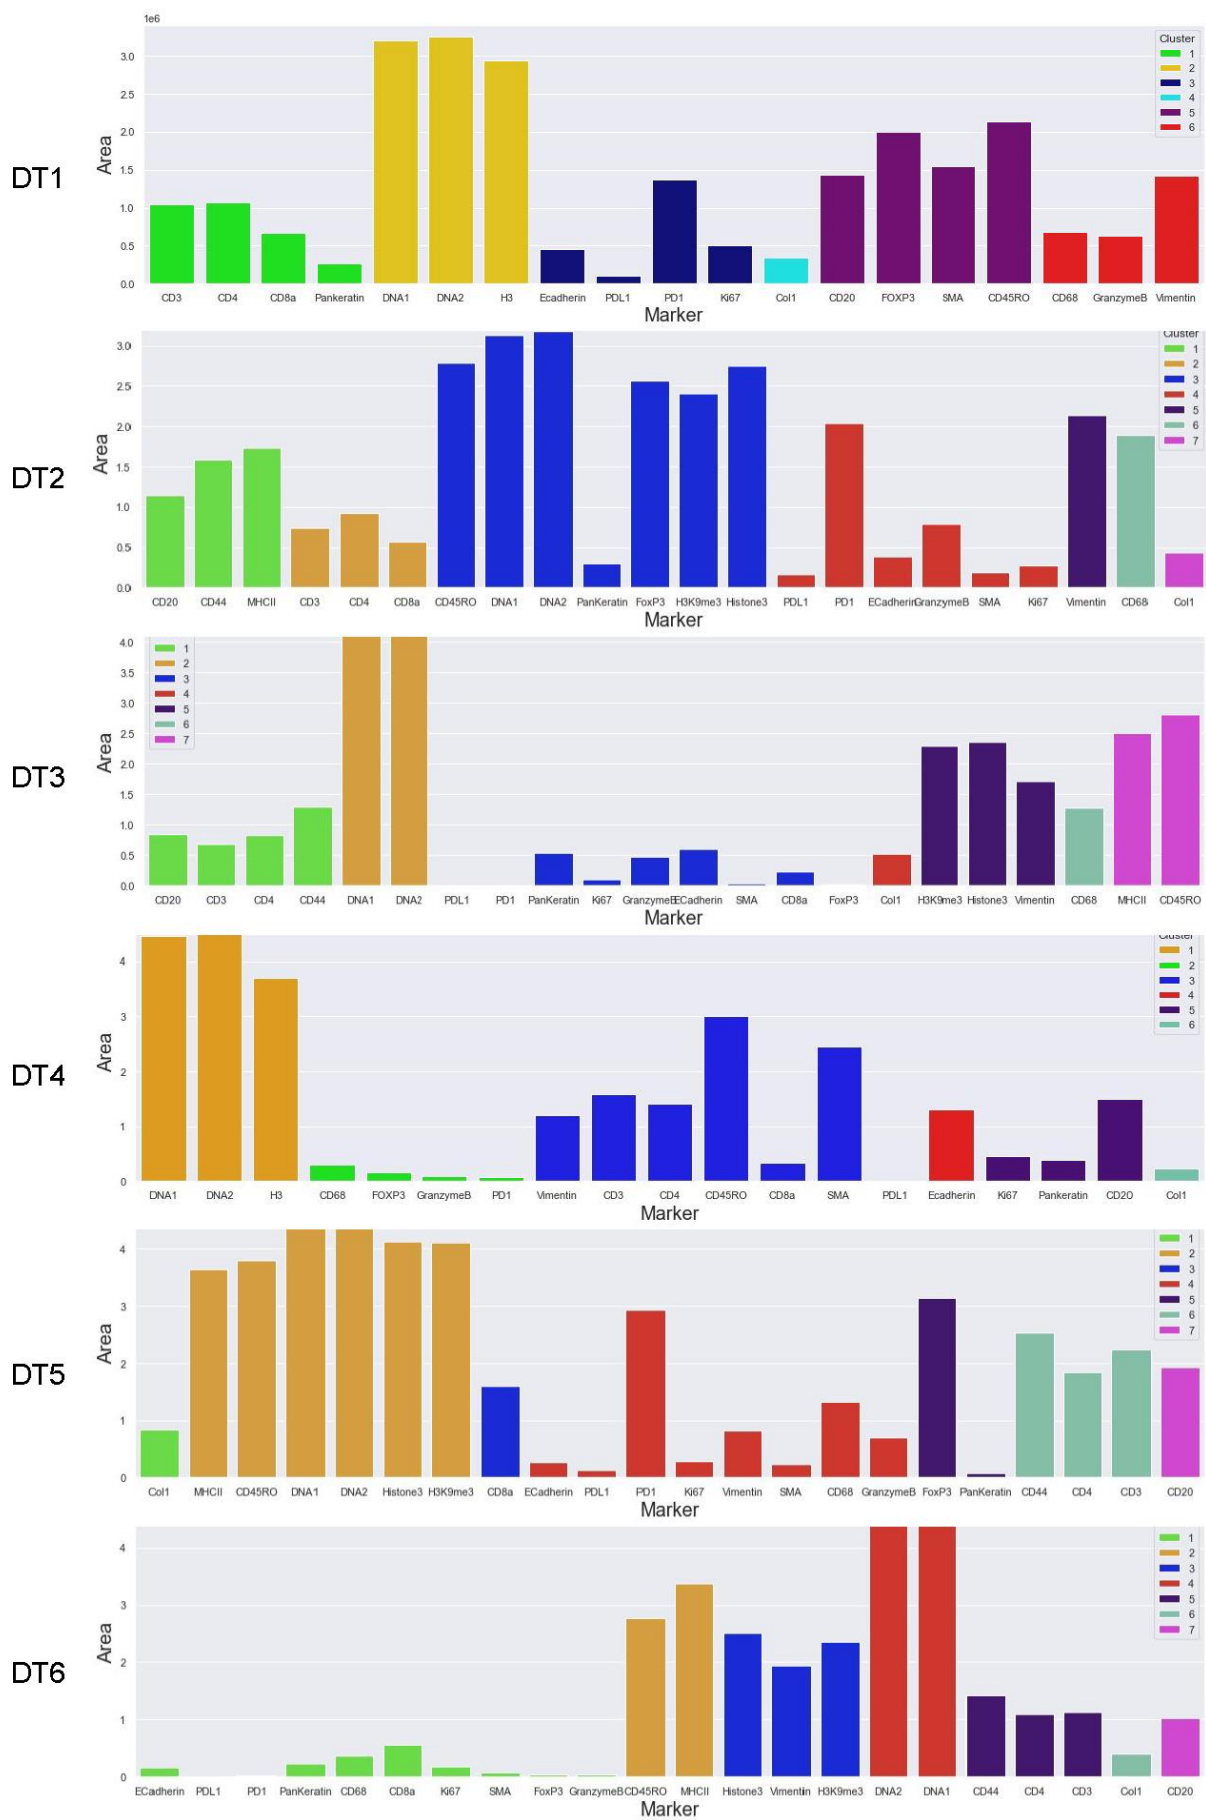

**Supplementary Figure 10. Area ratio for markers in three tissues from the diseased tonsil.**

Bar plots showed the area in the number of pixels of each marker in disease tonsil datasets. The color corresponding to the anatomical clustering results. DNA1, DNA2, and Histone 3 markers exhibited the highest area compared to other markers. Granzyme B's area coverage was higher in the first three datasets but relatively low compared to the last three.

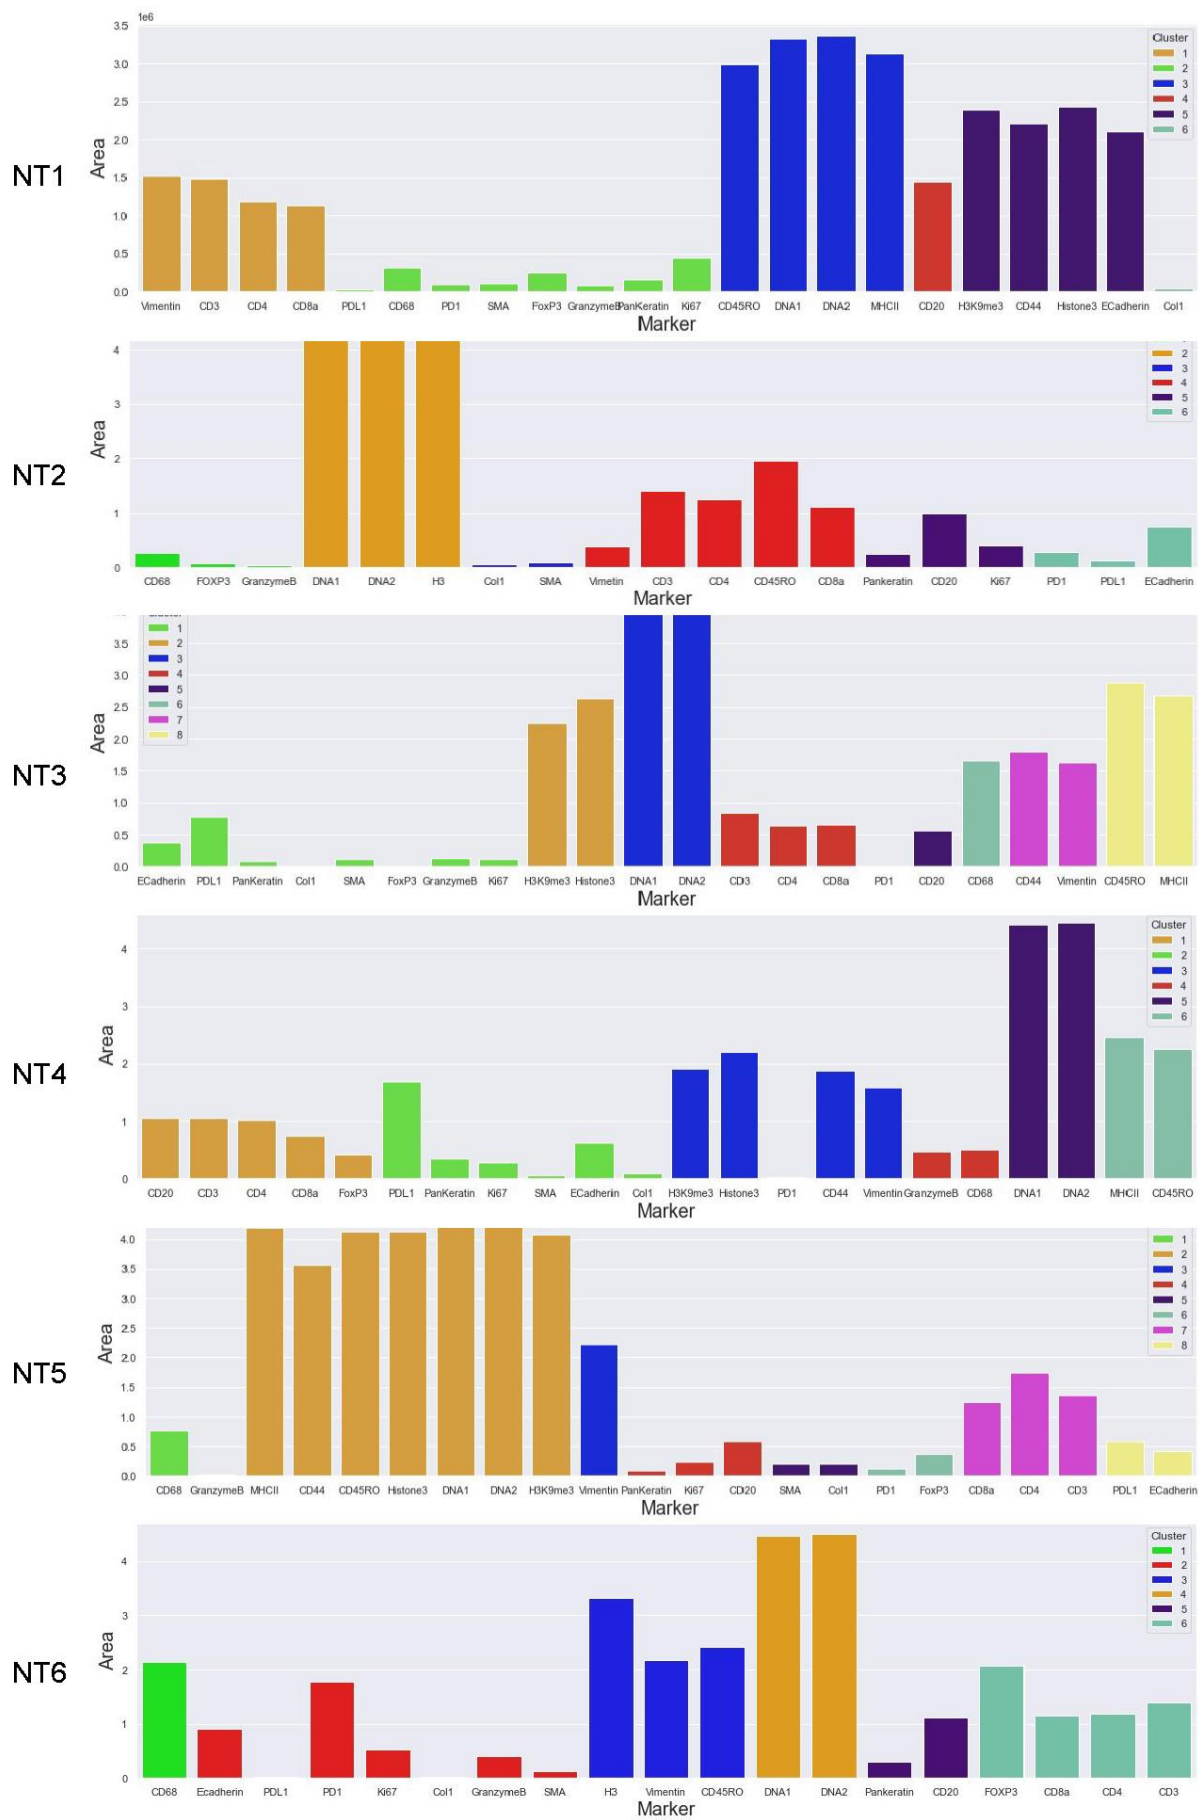

### **Supplementary Figure 11. Area ratio for markers in three tissues from the healthy tonsil.**

Bar plots demonstrated the area in the number of pixels of each marker in normal tonsil datasets. The color corresponds to the anatomical clustering results. DNA1, DNA2, and Histone3 markers showed the highest area compared to other markers. The Granzyme B covered a small area in the images across all the datasets.

## Normal tonsil (NT)

## Disease Tonsil (DT)

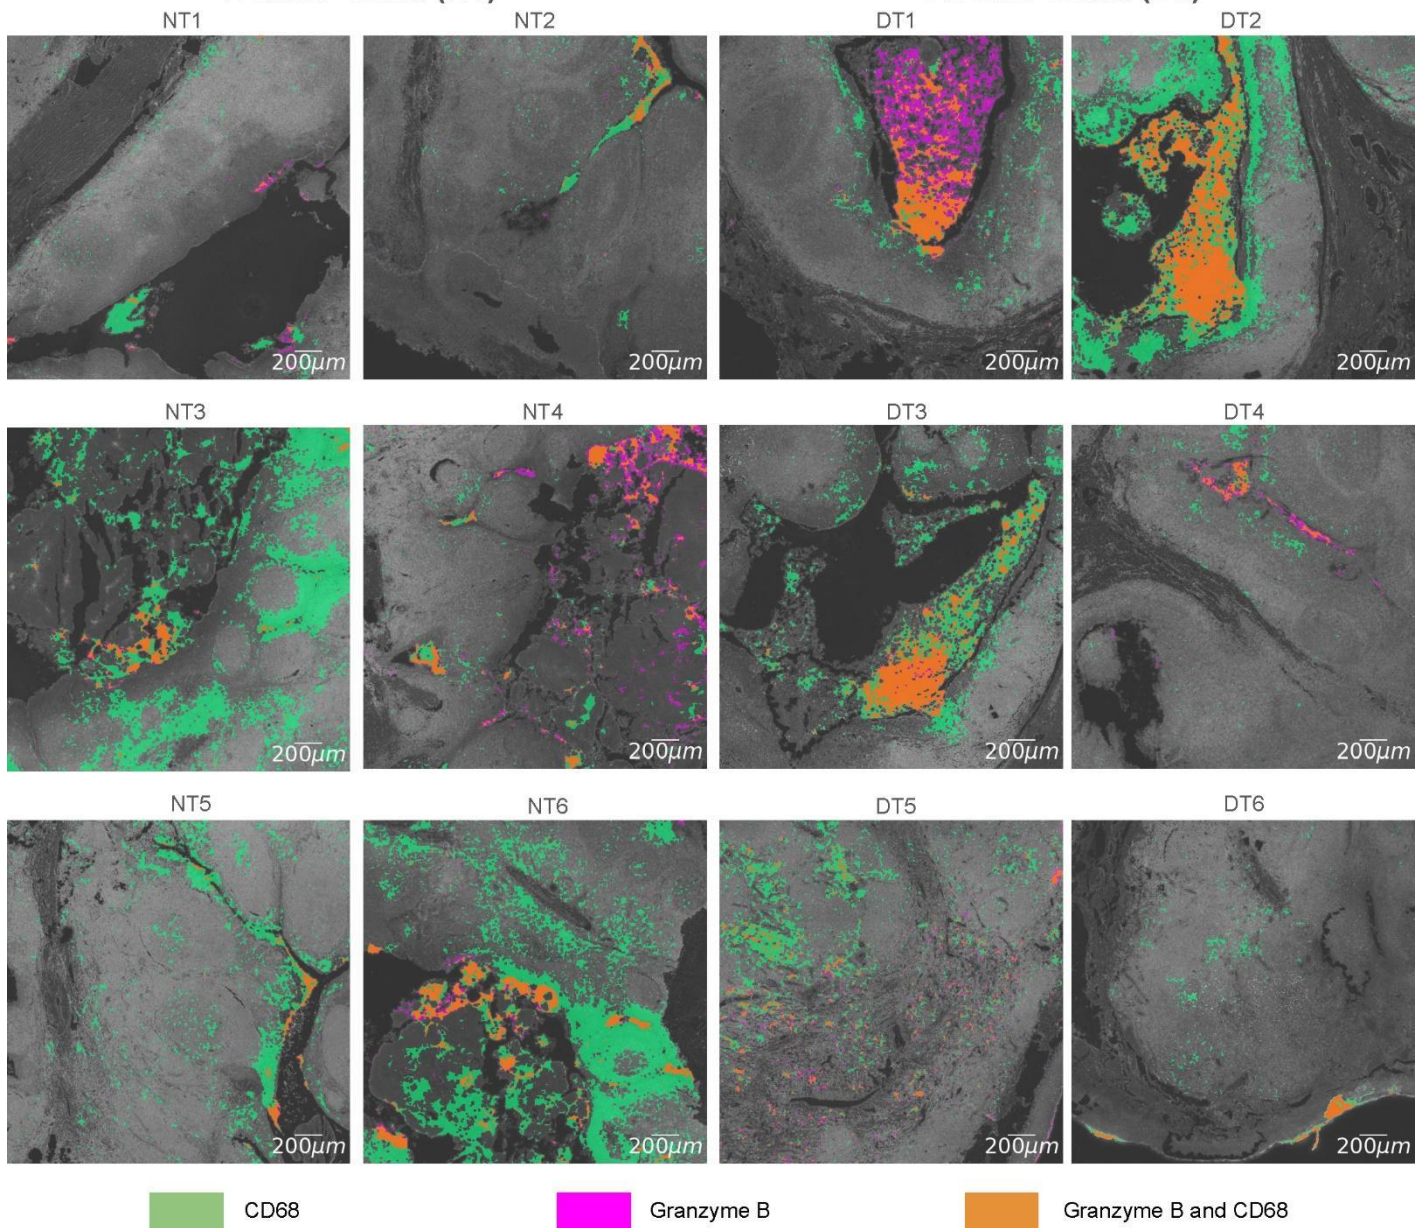

**Supplementary Figure 12. Granzyme B and CD68 marker co-expression region in disease and healthy datasets.**

Area representation of Granzyme B and CD68 markers in all tonsil datasets was shown. Granzyme B positive areas in green and CD68 marker regions were represented in magenta. The co-expression of the two markers was denoted in orange. The scale bar is 200  $\mu\text{m}$

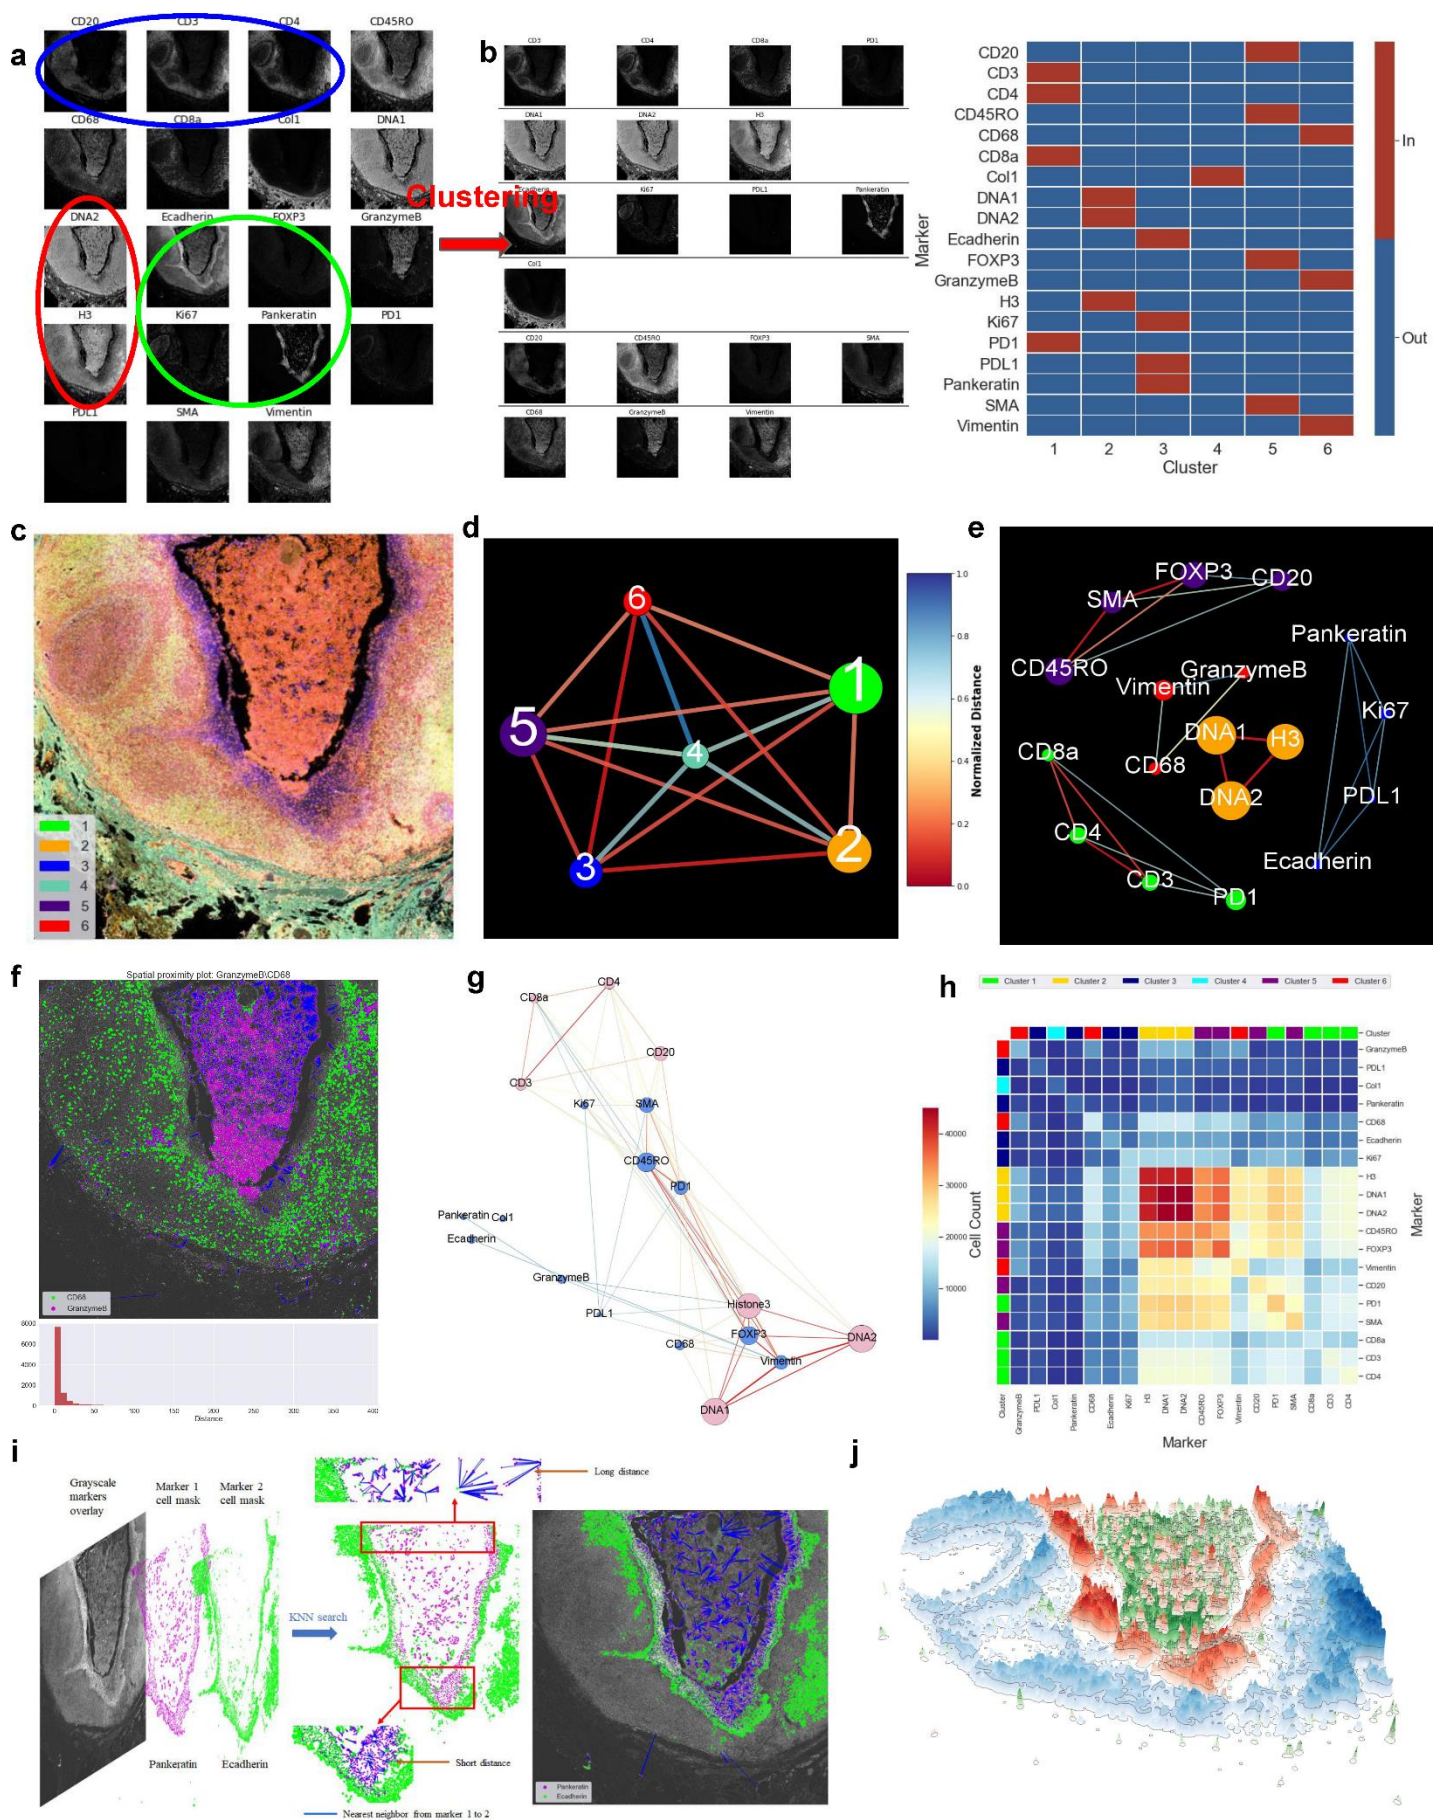

**Supplementary Figure 13. SpatialViz single-cell pathology of highly multiplexed protein maps in tonsils.**

- a** Original multiplex images showed marker-specific expression level before clustering.
- b** Anatomical clustering from marker expression level was presented.
- c** Clustering anatomic visual by assigning a unique color to each cluster mean image was demonstrated.
- d** Inter-cluster distance network based on clustering result was displayed.
- e** Intra-cluster marker distance network based on clustering results was shown.
- f** Spatial proximity plot of Granzyme B and CD68 markers presented the co-expression and proximity.
- g** Landmark reference plot was displayed.
- h** Marker co-expression by cell count for all markers was shown.
- i** A schema showed the spatial proximity plot generation process.
- j** Topography plots of CD44, Granzyme B, and Pankeratin markers were displayed.

## Normal tonsil (NT)

## Disease Tonsil (DT)

NT1

NT2

DT1

DT2

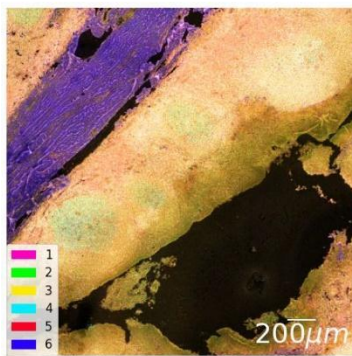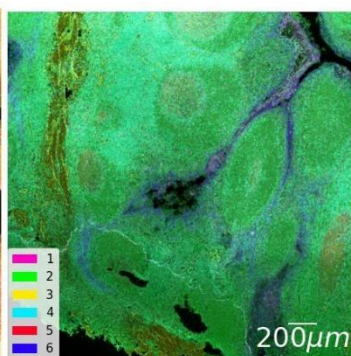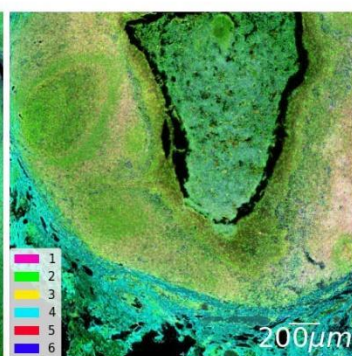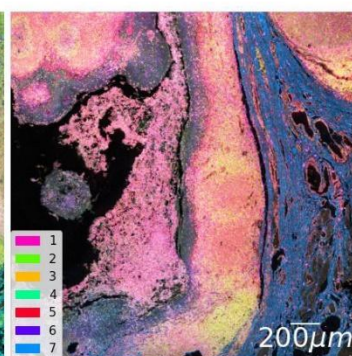

NT3

NT4

DT3

DT4

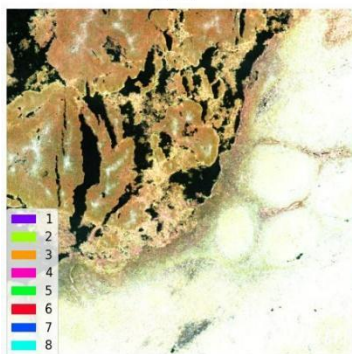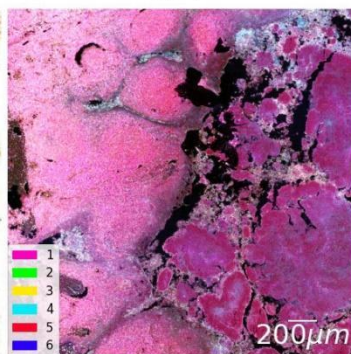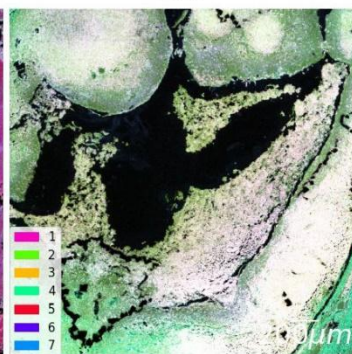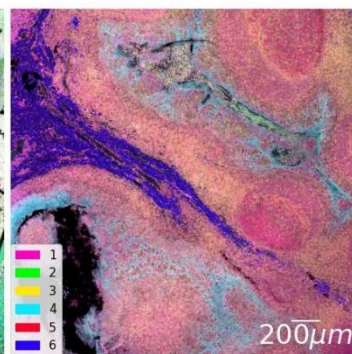

NT5

NT6

DT5

DT6

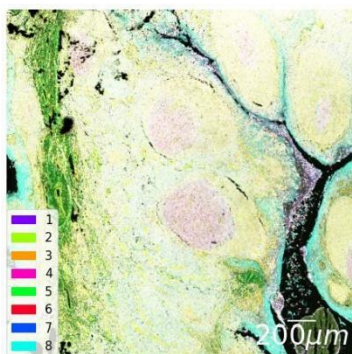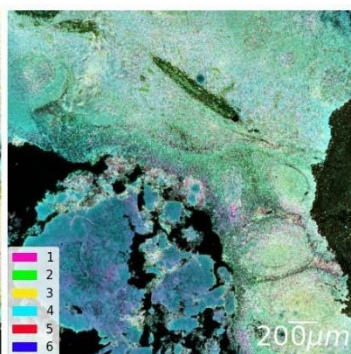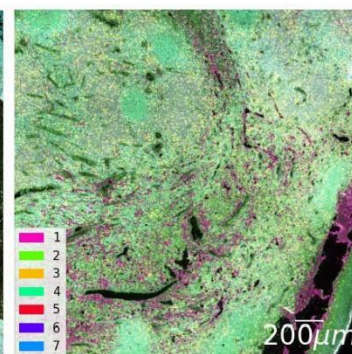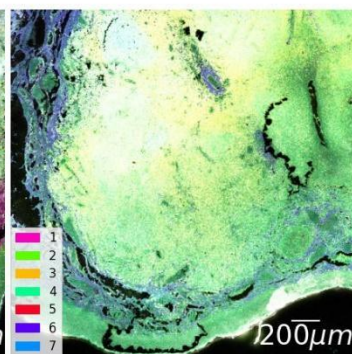

**Supplementary Figure 14. Multi-cluster representations of multiplex protein images in healthy and diseased tonsil tissues.**

Cluster representations of all tonsil dataset images were shown.

Each tonsil dataset was clustered in an unsupervised manner.

The mean of each cluster image was colored and overlaid together.

The scale bar is 200  $\mu\text{m}$

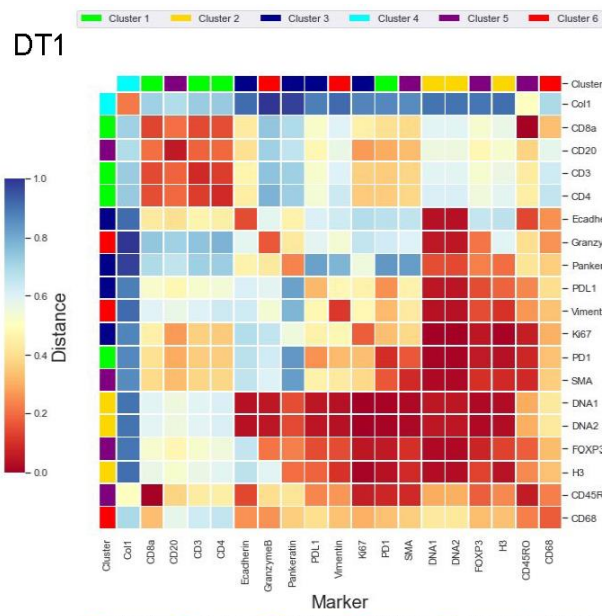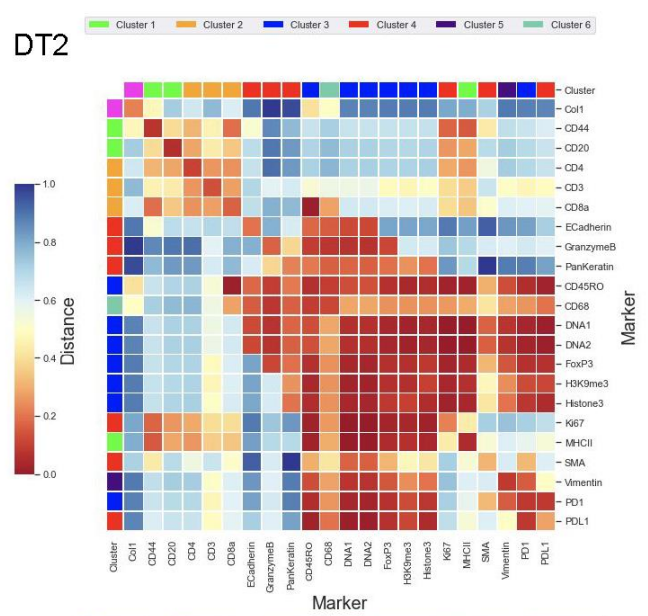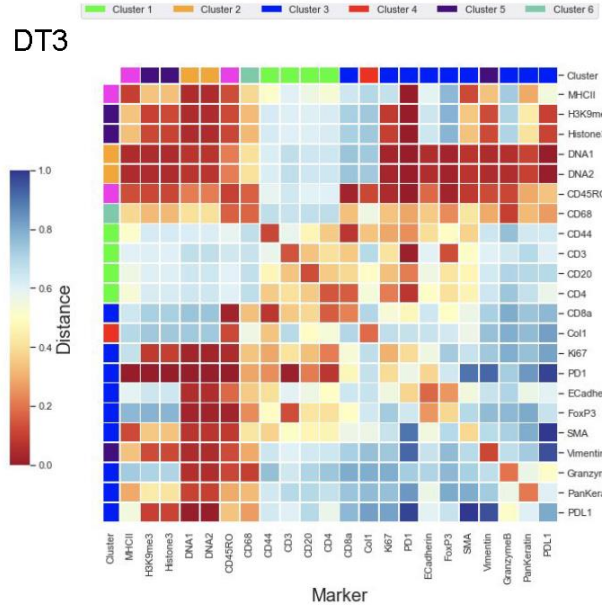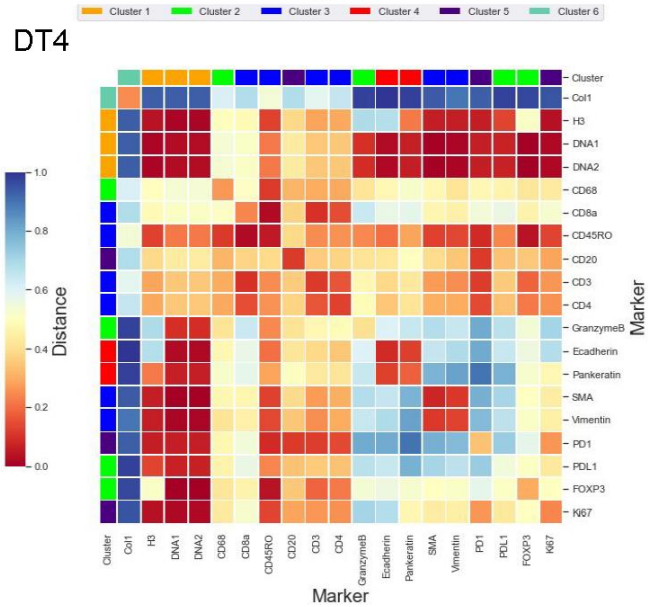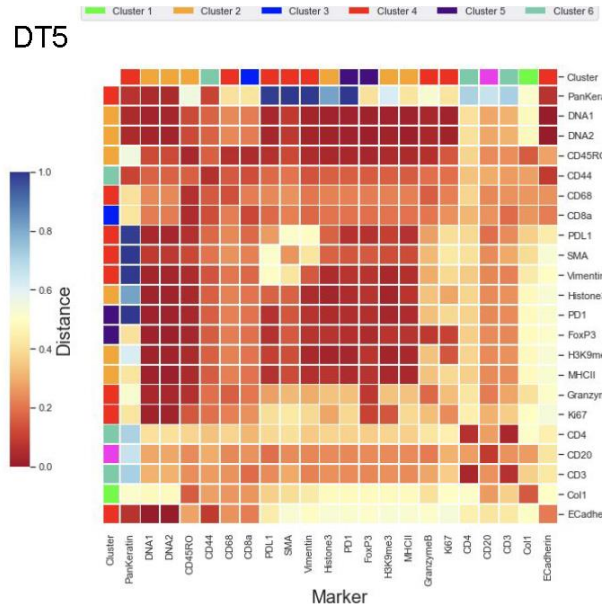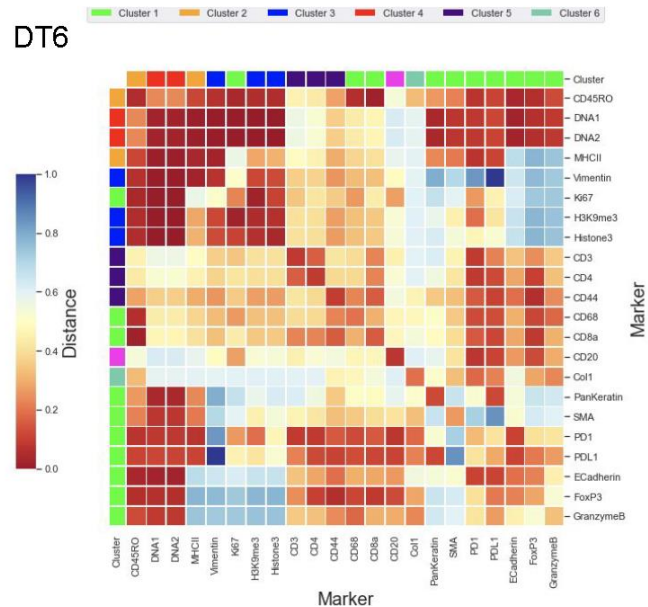

**Supplementary Figure 15. Heatmaps of pairwise distances of markers in tissues from diseased tonsil.**

Heatmaps represented the k-NN distance of cells between the pairs of markers in the diseased tonsil. The diagonal is the k-NN distance of the cells within a single marker that showed the marker expression's spread and density. The relative distances were normalized across the images. High overlapping regions such as DNA1, DNA2, and Histone 3 both exhibited short distances within the cells of the same marker and pair of markers.

NT1

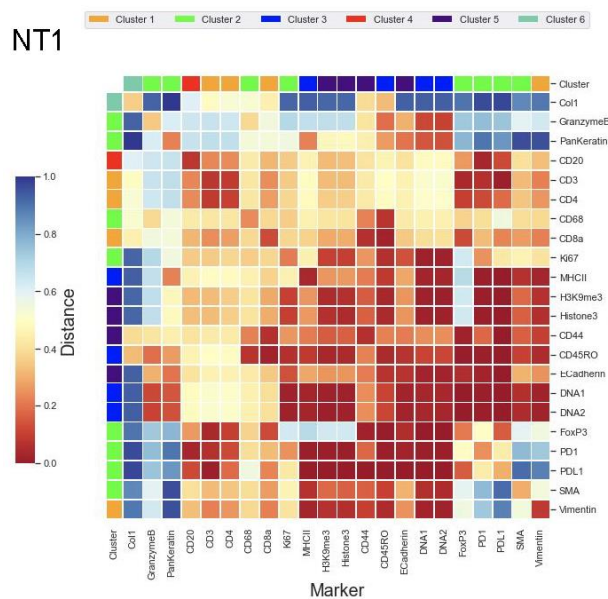

NT2

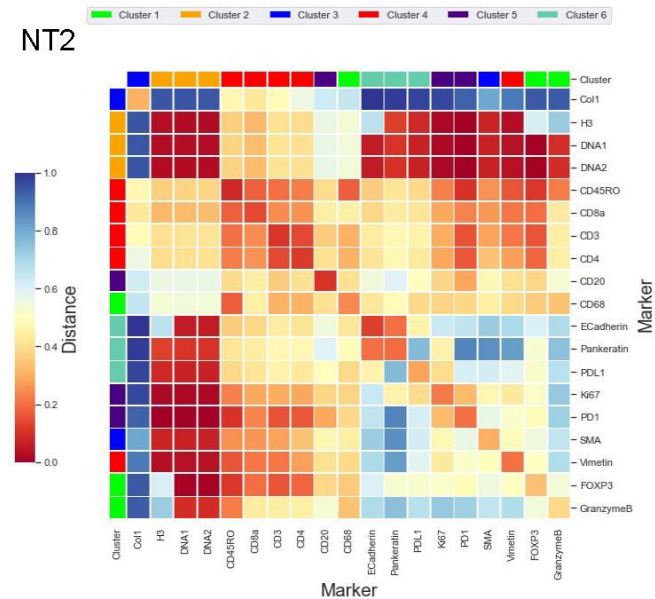

NT3

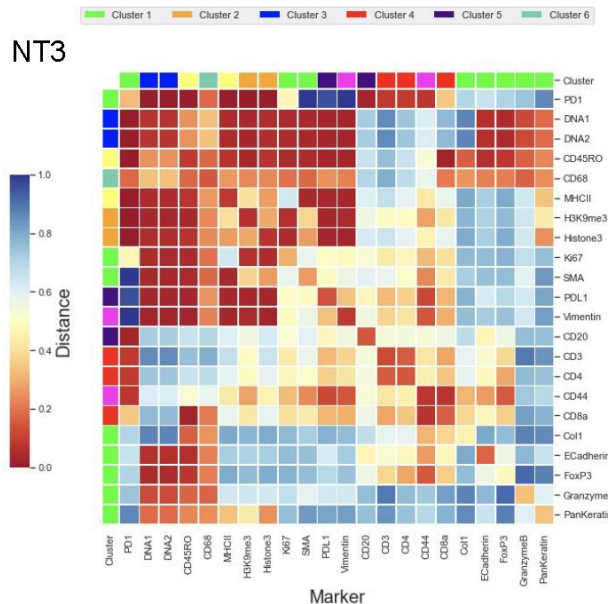

NT4

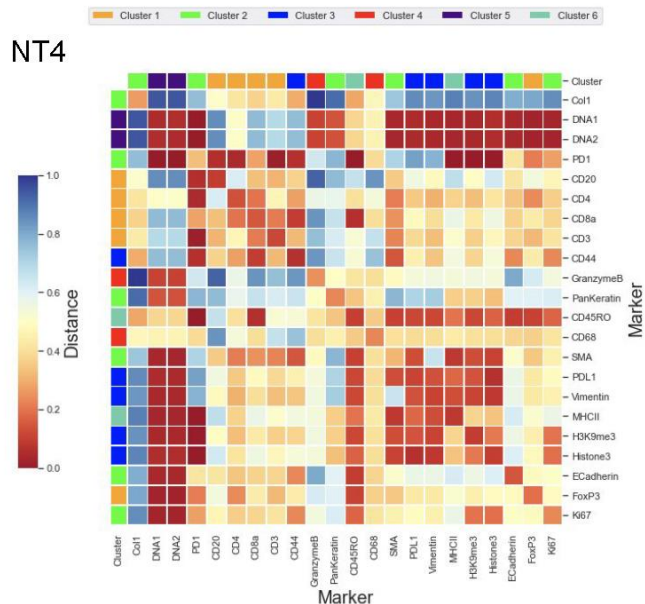

NT5

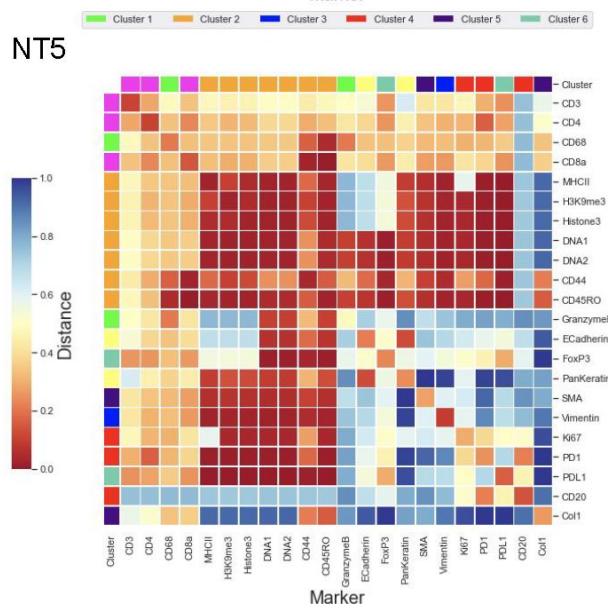

NT6

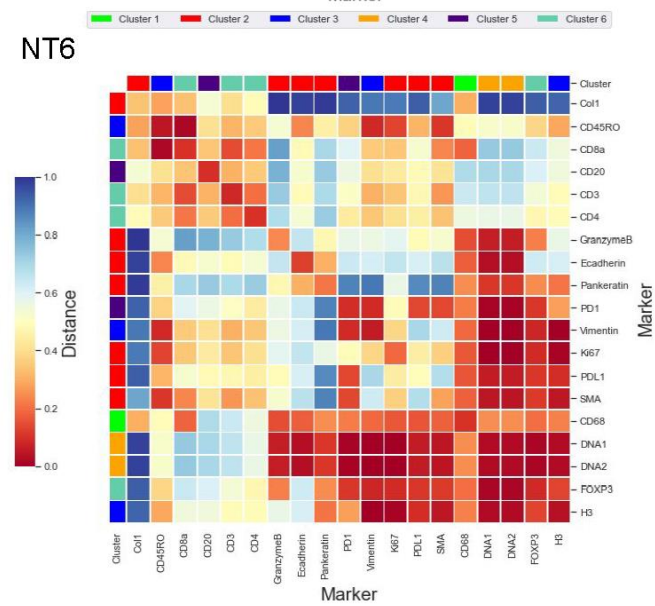

**Supplementary Figure 16. Heatmaps of pairwise distances of markers in tissues from the healthy tonsil.**

Heatmap showed the k-NN distances of cells between the pairs of markers in the healthy tonsil. The diagonal was the k-NN distance of cells within a single marker that demonstrated the marker expressions' spread and density. The relative distance was normalized across the images. High overlapping regions such as DNA 1, DNA 2, and Histone 3 both showed short distances within the cells of the same marker and pair of markers.

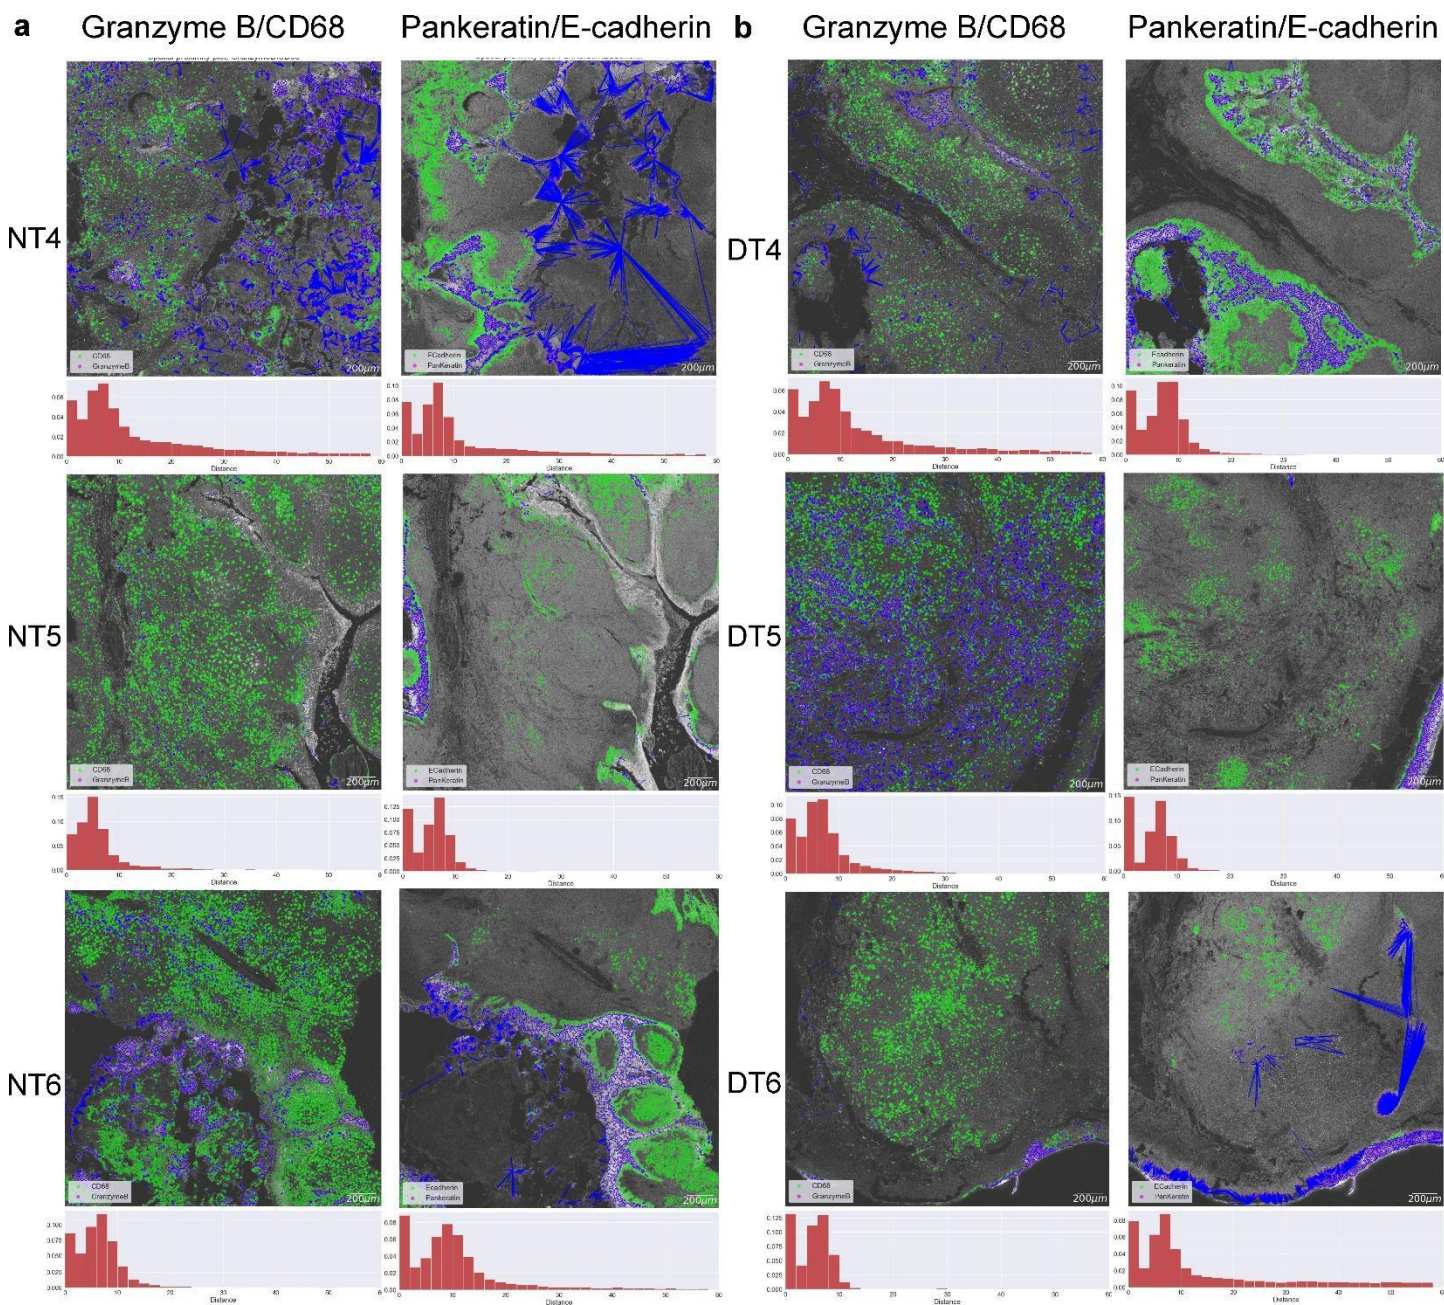

**Supplementary Figure 17. Spatial proximity maps of cell-pairs within a k-neighbor distance (k-NN) in healthy and disease tonsils.**

a Different spatial proximity map of cell pairs within nearest neighbor distance in healthy tonsil were shown. The scale bar is 200  $\mu\text{m}$

b Spatial proximity maps of cell pairs within the closest neighbor distance in healthy tonsils were demonstrated.

Magenta and green color represented individual cells in the pair of markers.

The presented plots corresponded to the Granzyme B/CD68 and Pankeratin/E-Cadherin pairs of the last three datasets of both diseased and healthy tonsils. The scale bar is 200  $\mu\text{m}$ .

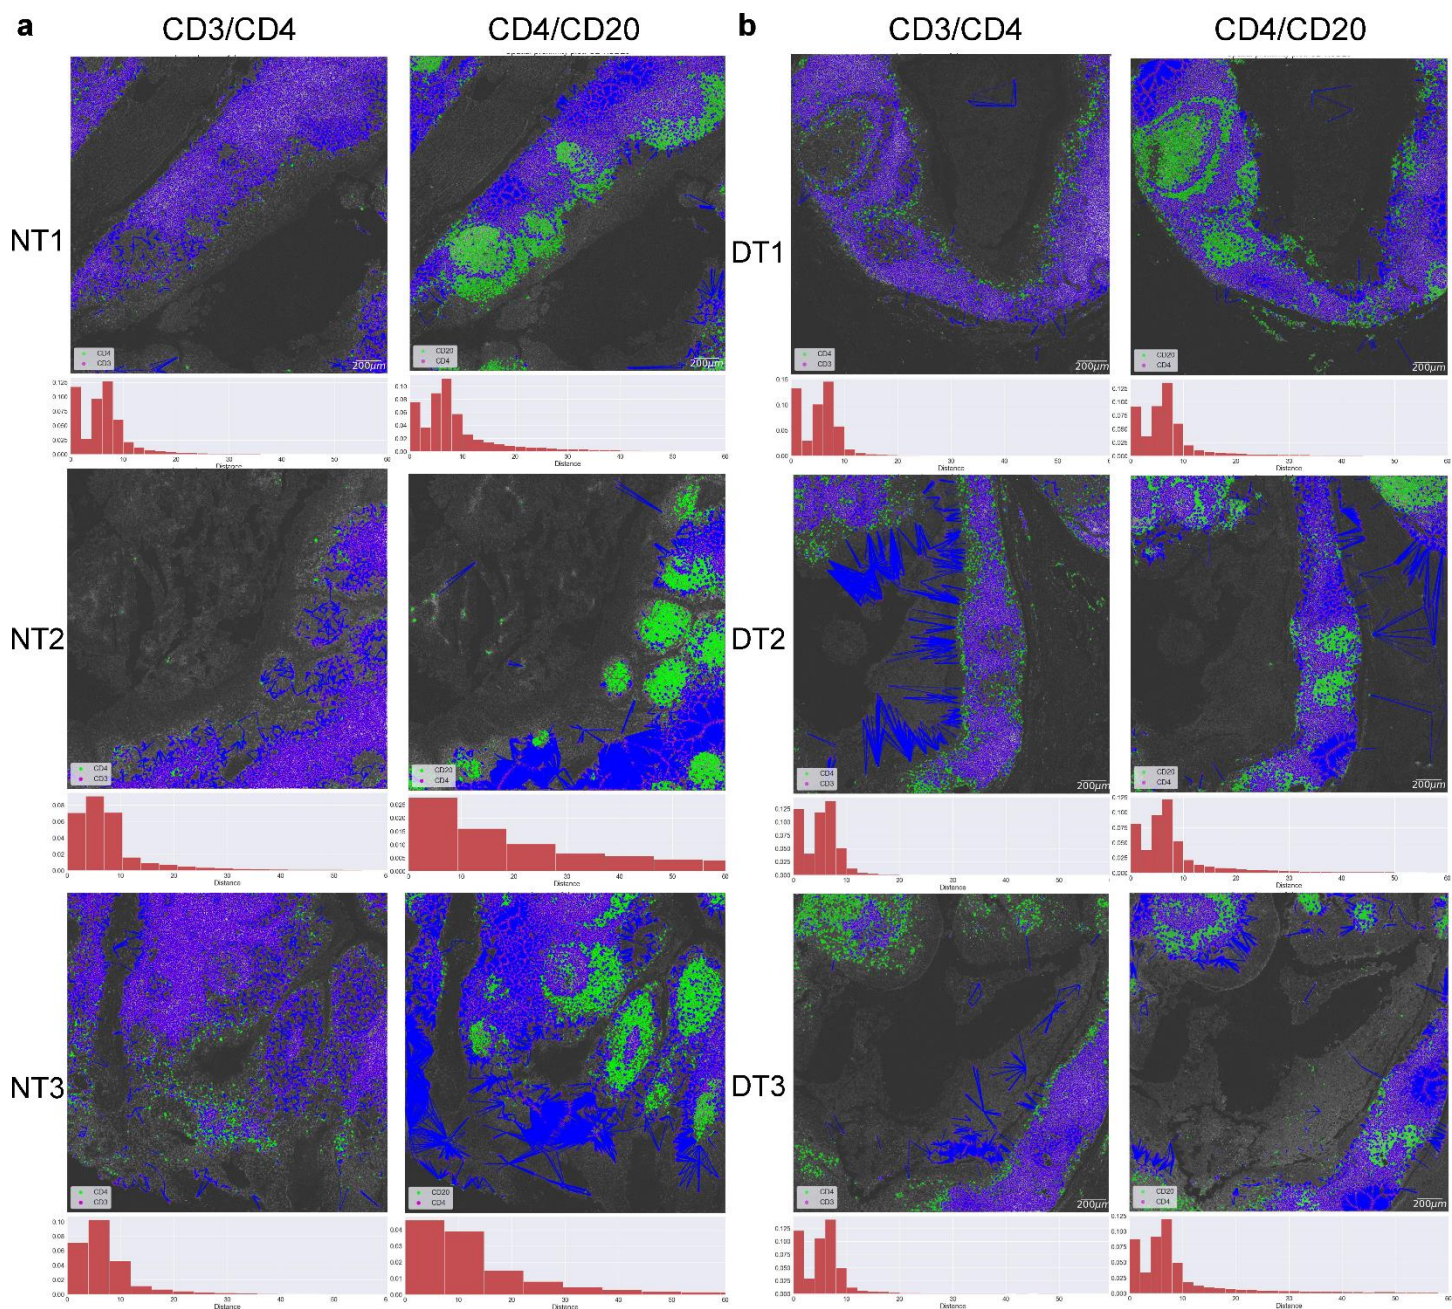

**Supplementary Figure 18. Spatial proximity maps of cell pairs within a k-neighbor distance (k-NN) in healthy and disease tonsils for T cell marker pairs.**

a Distinct spatial proximity maps of cell pairs within nearest neighbor distance in healthy tonsil were displayed.

The scale bar is 200  $\mu\text{m}$

b Spatial proximity maps of cell pairs within closest neighbor distance in healthy tonsil were shown.

Magenta and green color denoted the individual cells in the pair of markers.

The plots showed the CD3/CD4 and CD4/CD20 pairs of the first three datasets of both diseased and healthy tonsils. The scale bar is 200  $\mu\text{m}$ .

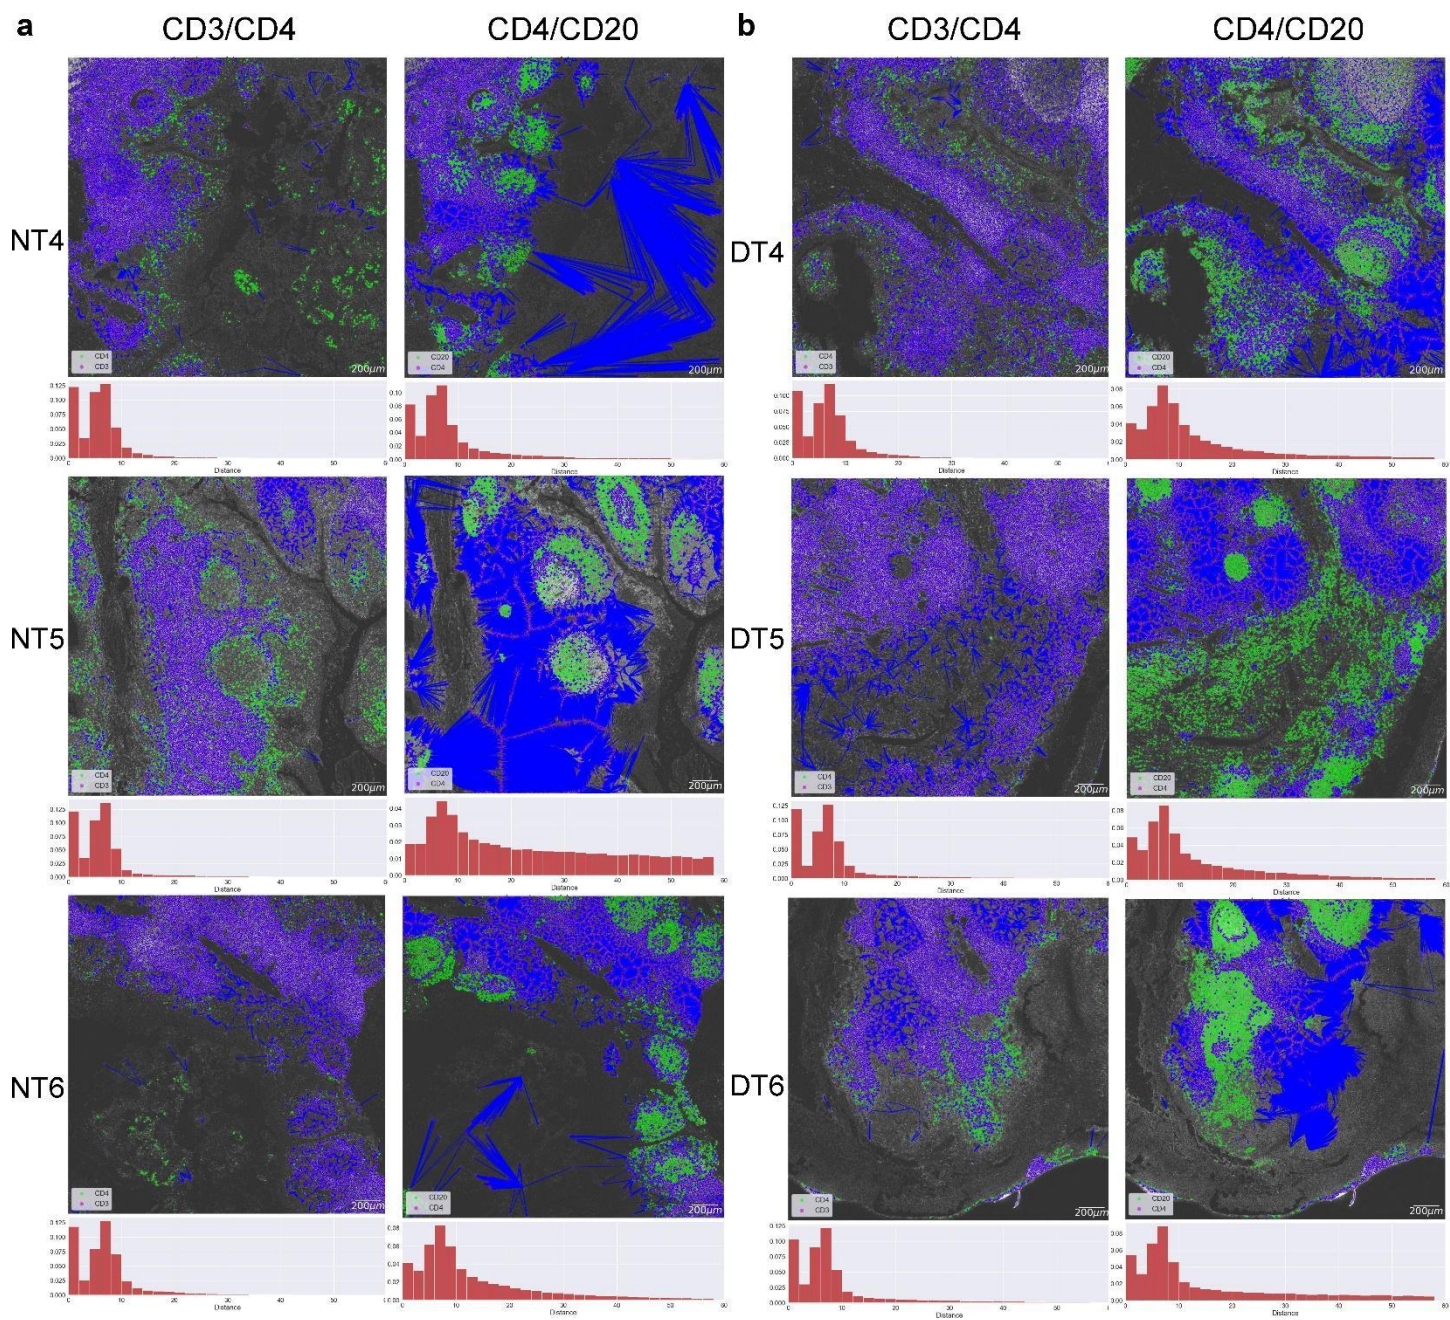

**Supplementary Figure 19. Spatial proximity maps of cell pairs within a k-neighbor distance (k-NN) in healthy and disease tonsils for T cell marker pairs.**

**a** A set of spatial proximity maps of cell pairs within nearest neighbor distance in healthy tonsil were shown.

**b** Spatial proximity maps of cell pairs within nearest neighbor distance in healthy tonsil were displayed.

Magenta and green color indicated the individual cells in the pair of markers.

The plots displayed the CD3/CD4 and CD4/CD20 pairs of the last three datasets of both diseased and healthy tonsils. The scale bar is 200  $\mu\text{m}$ .

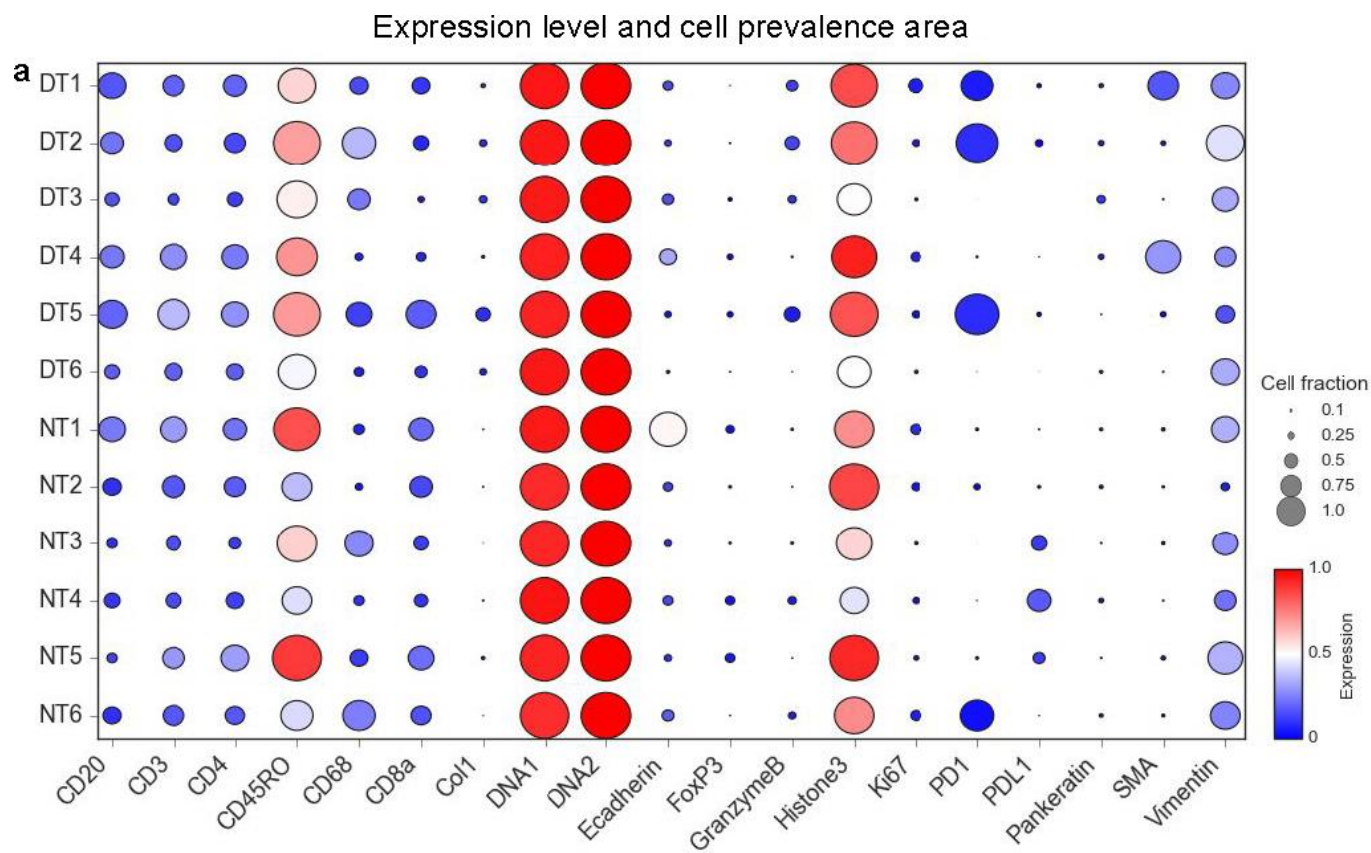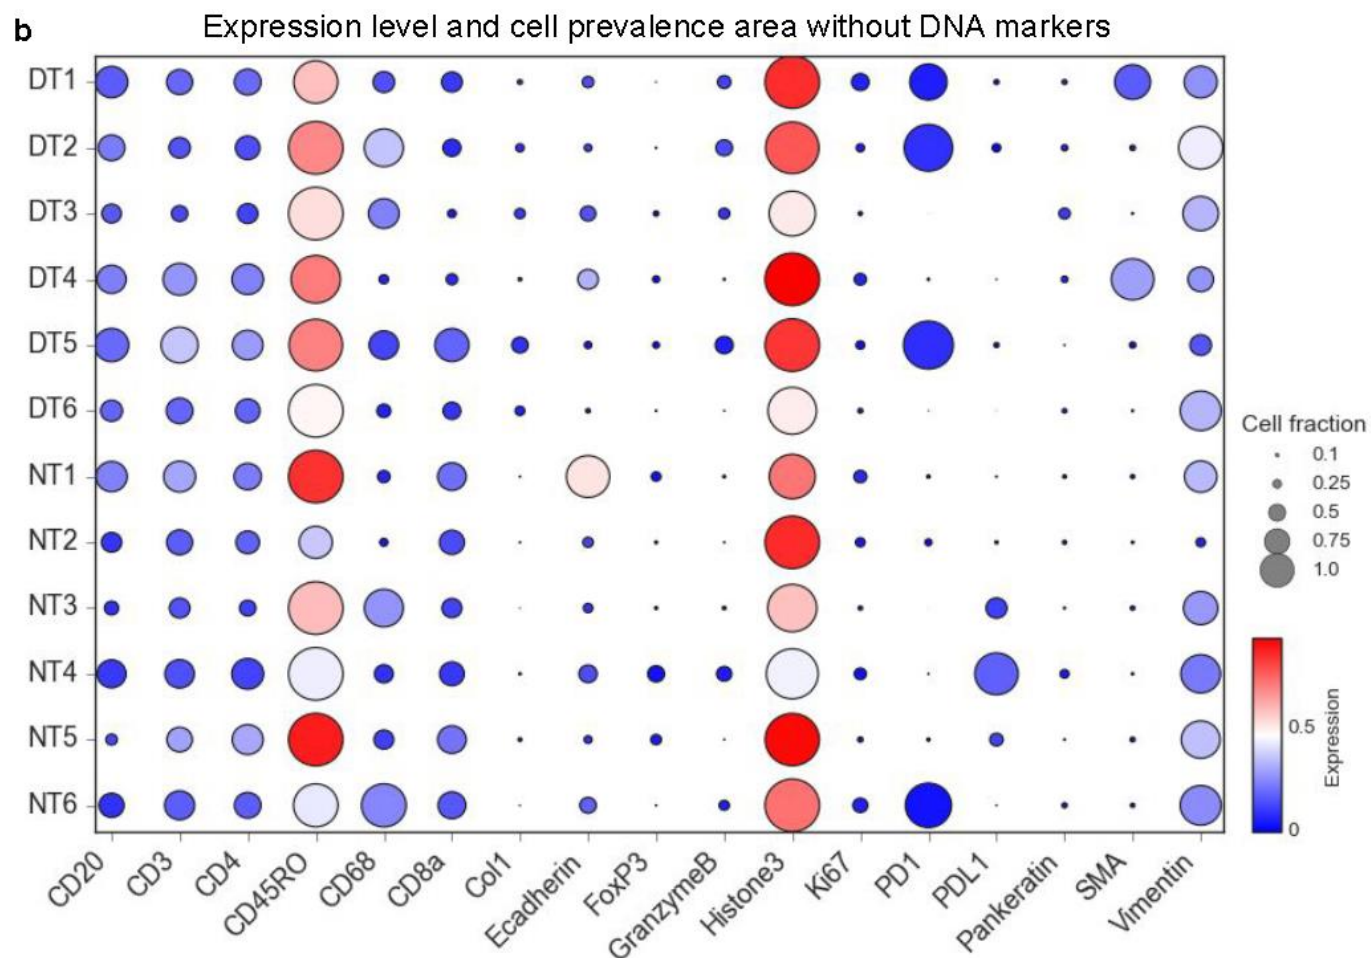

## **Supplementary Figure 20. Dot plot representation of markers expression level and cell prevalence area**

Dot plot representation of markers expression level and cell prevalence area for all 12 ROIs. The circle area represents the cell prevalence area of a specific marker, and the colormap represents the normalized expression level.

**a** Dot plot with DNA1 and DNA2 marker

**b** Dot plot without DNA1 and DNA2 marker

**a** Clustering expression level and cell prevalence area

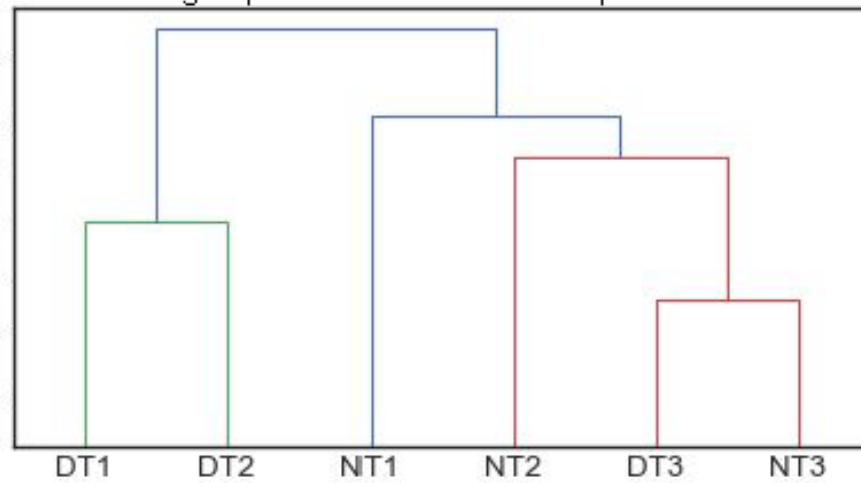

**b** Clustering expression level and cell prevalence area with only CD68, GranzymeB, Ki67, PD1, Pankeratin, SMA, Vimentin markers

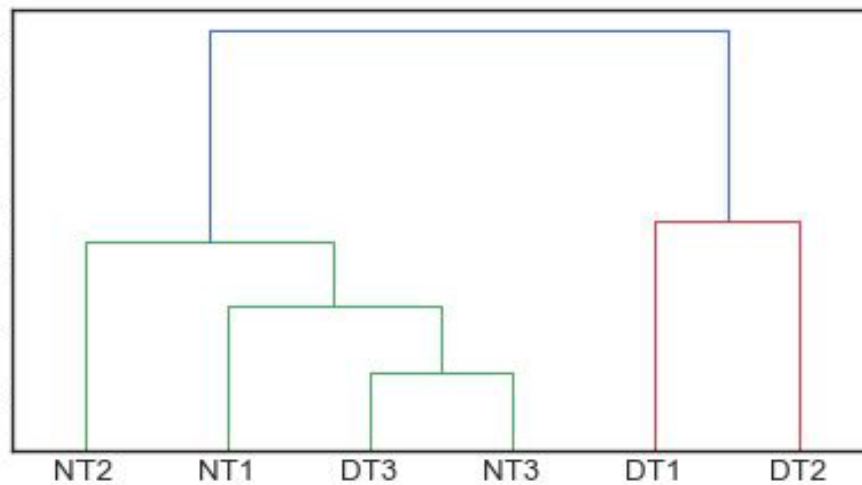

**c** Clustering pairwise marker mean cell-to-cell distance and fraction of distance inferior to 30  $\mu\text{m}$ .

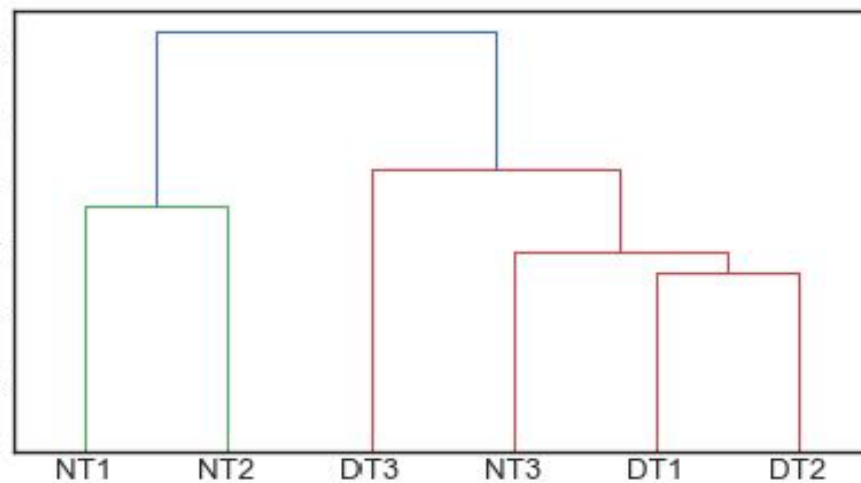

## **Supplementary Figure 21. Dataset clustering based on extracted features**

Clustering was performed in three healthy and three disease datasets based on the following conditions.

**a** Markers expression level and cell prevalence area for all data were analyzed.

**b** Markers expression level and cell prevalence area using only CD68, GranzymeB, Ki67, PD1, Pankeratin, SMA, Vimentin markers were processed.

**c** Pairwise marker mean cell-to-cell distance and fraction of distance inferior to 30  $\mu\text{m}$ .

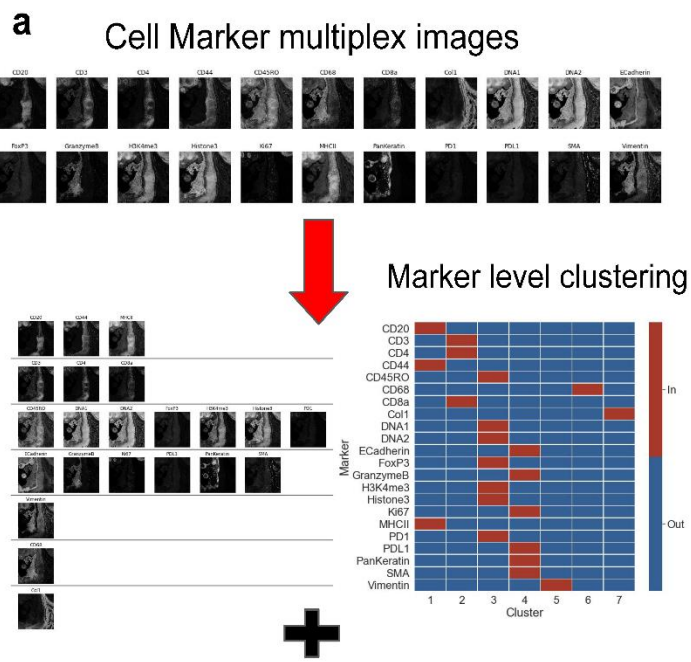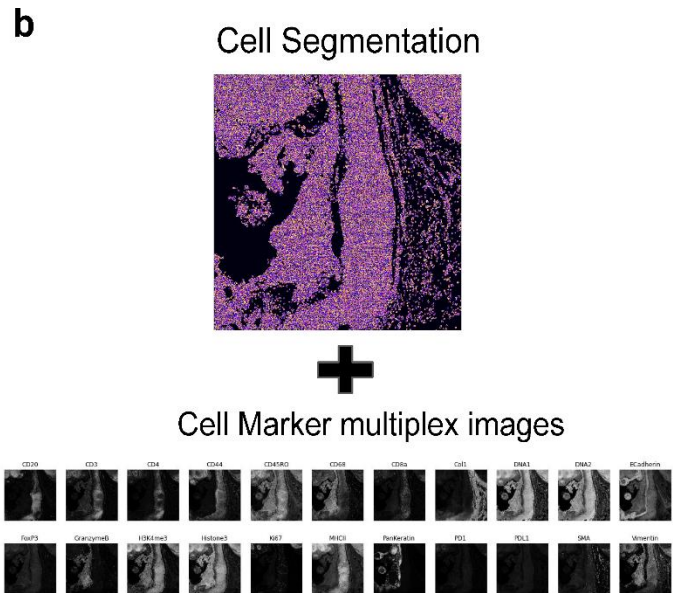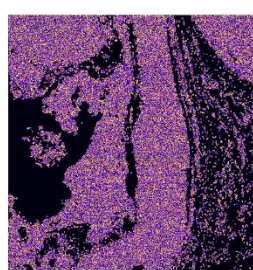

Data Analysis  
Spatial expression

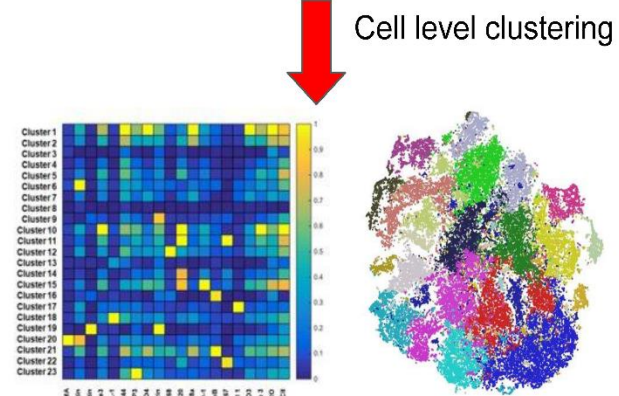

Data Analysis  
Expression  
level

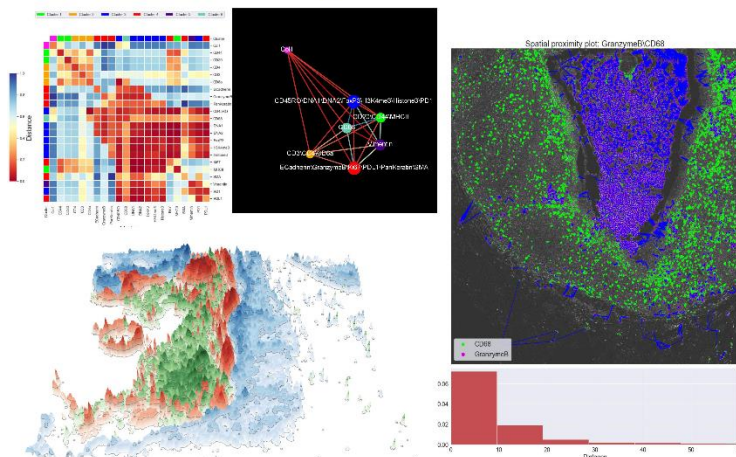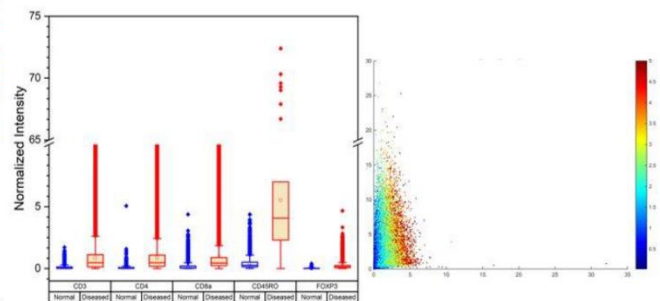

## **Supplementary Figure 22. SpatialViz combines top-down and bottom-up approaches.**

Comparison of two mainstream analysis approaches in the right and left columns.

Both approaches utilize the same image dataset with cell segmentation and marker expression images. The bottom-up analysis processes the single-cell level information, and the top-down approach visualizes the marker anatomy.

**a** Top-down approach maps the multiple markers' anatomical features and then combines the single-cell level information from the bottom-up approach for a hybrid data analysis.

**b** Bottom-up approach starts with the single-cell segmentation information and quantifies each cell presence in the multiplexed images for quantification of cellular abundance and co-expressions.

| Marker Name     | Metal | Isotope | Antibody Concentration (mg/ml) | Final Dilution | Source   | Catalog Number |
|-----------------|-------|---------|--------------------------------|----------------|----------|----------------|
| CD20            | Dy    | 161     | 0.5                            | 1:400          | Fluidigm | 3161029D       |
| CD3             | Er    | 170     | 0.5                            | 1:100          | Fluidigm | 3170019D       |
| CD4             | Gd    | 156     | 0.5                            | 1:200          | Fluidigm | 3156033D       |
| CD45RO          | Yb    | 173     | 0.5                            | 1:50           | Fluidigm | 3173016D       |
| CD68            | Tb    | 159     | 0.5                            | 1:50           | Fluidigm | 3159035D       |
| CD8a            | Dy    | 162     | 0.5                            | 1:100          | Fluidigm | 3162034D       |
| FoxP3           | Gd    | 155     | 0.5                            | 1:30           | Fluidigm | 3155016D       |
| Pan-Keratin     | Nd    | 148     | 0.5                            | 1:100          | Fluidigm | 3148020D       |
| Granzyme B      | Er    | 167     | 0.5                            | 1:100          | Fluidigm | 3167021D       |
| Ki-67           | Er    | 168     | 0.5                            | 1:50           | Fluidigm | 3168022D       |
| PD-1            | Ho    | 165     | 0.5                            | 1:30           | Fluidigm | 3165039D       |
| PD-L1           | Nd    | 150     | 0.5                            | 1:30           | Fluidigm | 3150031D       |
| Alpha-SMA       | Pr    | 141     | 0.5                            | 1:200          | Fluidigm | 3141017D       |
| Collagen type 1 | Tm    | 169     | 0.5                            | 1:300          | Fluidigm | 3169023D       |
| E-cadherin      | Gd    | 158     | 0.5                            | 1:50           | Fluidigm | 3158029D       |
| Histone 3       | Yb    | 171     | 0.5                            | 1:50           | Fluidigm | 3171022D       |
| Vimentin        | Nd    | 143     | 0.5                            | 1:100          | Fluidigm | 3143027D       |
| CD44            | Eu    | 153     | 0.5                            | 1:100          | Fluidigm | 3153029D       |
| MCHII           | Lu    | 175     | 1.64                           | 1:200          | Abcam    | ab55152        |
| H3K9me3         | Sm    | 149     | 1.36                           | 1:400          | Abcam    | ab232324       |
| Intercalator    | Ir    | 192/193 | 125uM stock                    | 1:400          | Fluidigm | 201192A        |

**Supplementary Table 1. The isotope-labeled antibody panel for imaging mass cytometry experiments.**

The table shows all the markers investigated in this study alongside their conjugated metal isotope, antibody concentration, and dilution used in the final cocktail staining mix.

## Supplementary Notes:

### Details about the Fluidigm Imaging Mass Cytometer

#### ROIs size and Imaging Time:

Regions of interest (ROIs) chosen from the tonsil samples were approximately 2500  $\mu\text{m}$  x 2500  $\mu\text{m}$ . The laser type is Nd: YAG with a wavelength of 213-nm. The energy output was less than or equal to 3 $\mu\text{J}$ . It takes 2 hours to image 1 $\text{mm}^2$ ; thereby, it took approximately 12.5 hours to acquire individual ROIs on the tonsil sections.

| Description                        | System Specifications                       |
|------------------------------------|---------------------------------------------|
| Laser type                         | Nd: YAG                                     |
| Wavelength                         | 213 nm                                      |
| Energy Output                      | 3 $\mu\text{J}$                             |
| Tissue thickness for full ablation | $\leq 7\mu\text{m}$ thickness               |
| Sample size                        | $\geq 15 \text{ mm} \times 45 \text{ mm}$   |
| Scan Area                          | $\geq 1 \text{ mm}^2 / 2\text{Hr}$ (@200Hz) |

**Supplementary Table 2. System specification for the Hyperion imaging system by Fluidigm.**

| Slide             | Imaging Time (H: M:S) | Laser Power (dB) | Ablation Power (Hz) |
|-------------------|-----------------------|------------------|---------------------|
| Normal Tonsil 1   | 9:59:51               | 2.5              | 200                 |
| Normal Tonsil 2   | 9:59:51               | 2.5              | 200                 |
| Normal Tonsil 3   | 9:59:51               | 2                | 200                 |
| Diseased Tonsil 1 | 7:45:34               | 2                | 200                 |
| Diseased Tonsil 2 | 9:59:51               | 2                | 200                 |
| Diseased Tonsil 3 | 9:59:51               | 2.5              | 200                 |

**Supplementary Table 3. Experimental details regarding samples, imaging time, laser power, and ablation power were used to obtain the paper's data.**

Since these product specifications can vary between different experimental runs, we also included some of the parameters associated with two experimental runs for one normal tonsil sample and one diseased tonsil sample. As shown in the snapshots below, different ablation energy values were tried out before choosing the ROIs' final values. This optimization process was done by testing out different values of ablation energies on smaller regions 100  $\mu\text{m}$  x 100  $\mu\text{m}$  instead of 2500  $\mu\text{m}$  x 2500  $\mu\text{m}$ . The value that resulted in a strong signal with the minimum background was finally chosen for the bigger ROIs.

## Fluidigm Hyperion imaging system machine details for all ROIs used to obtain the data

### Normal Tonsil 1

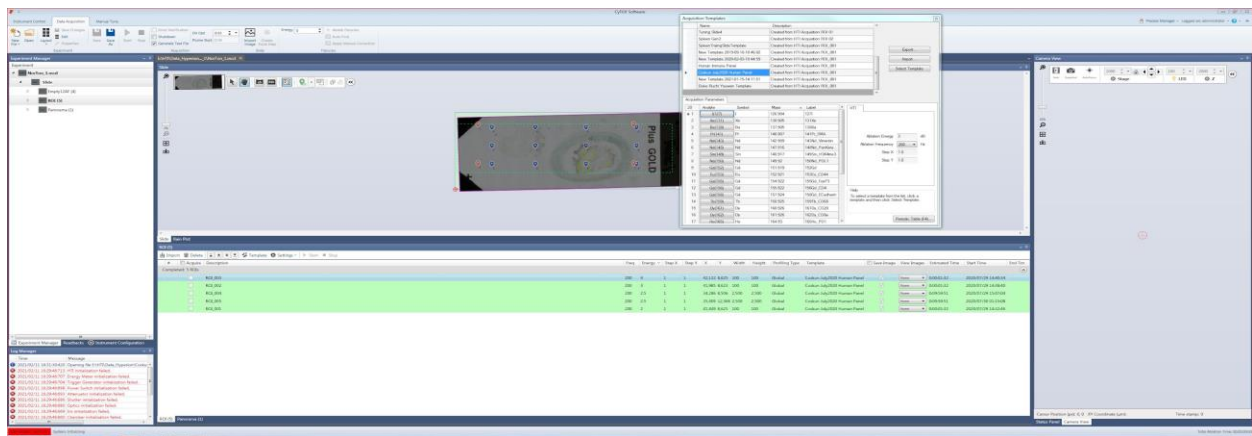

### Normal Tonsil 2

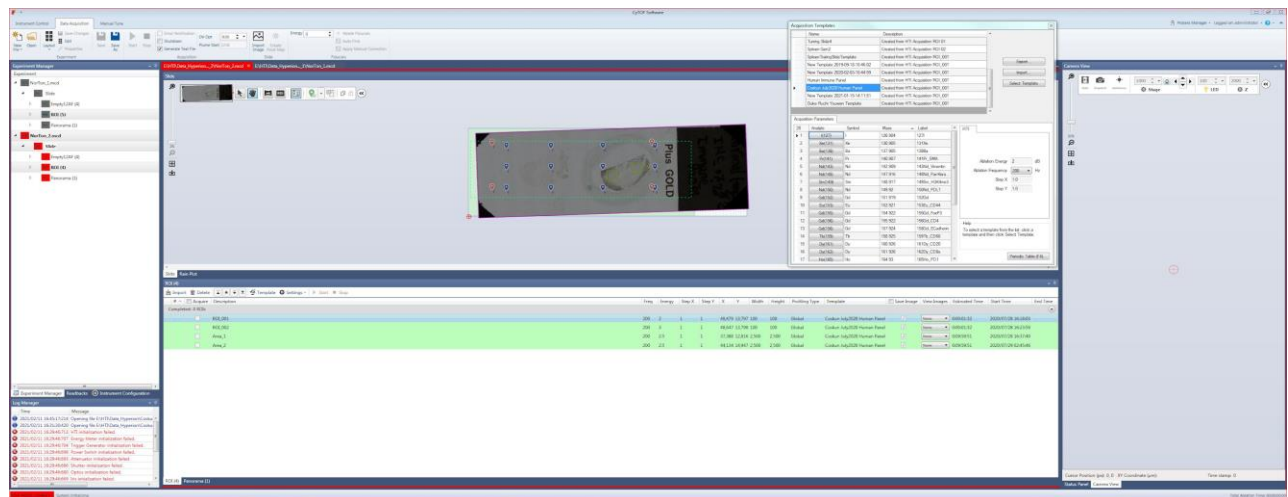

## Normal Tonsil 3

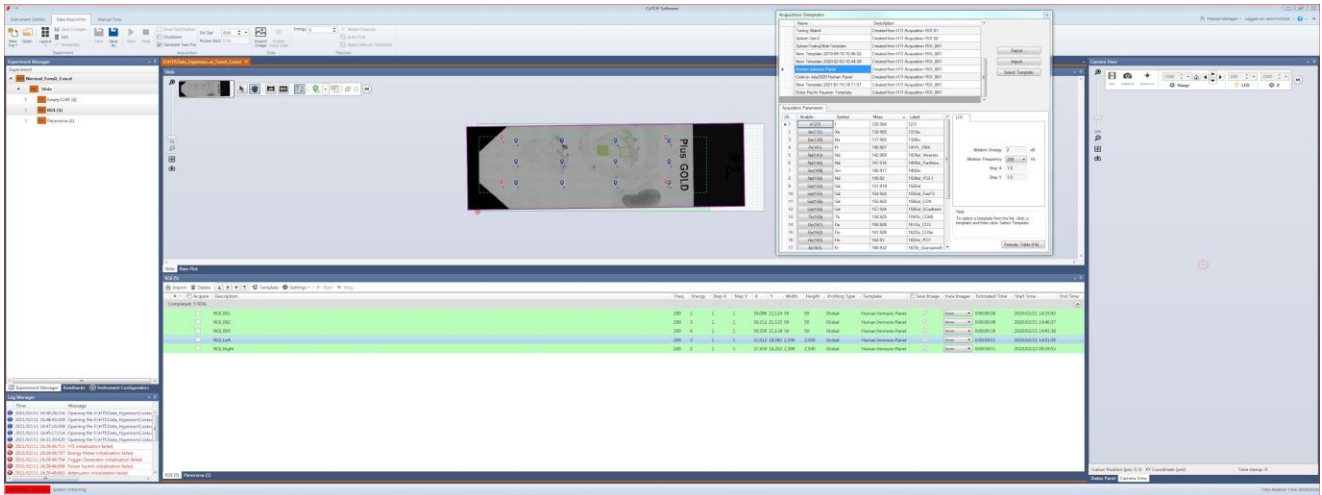

## Diseased Tonsil 1

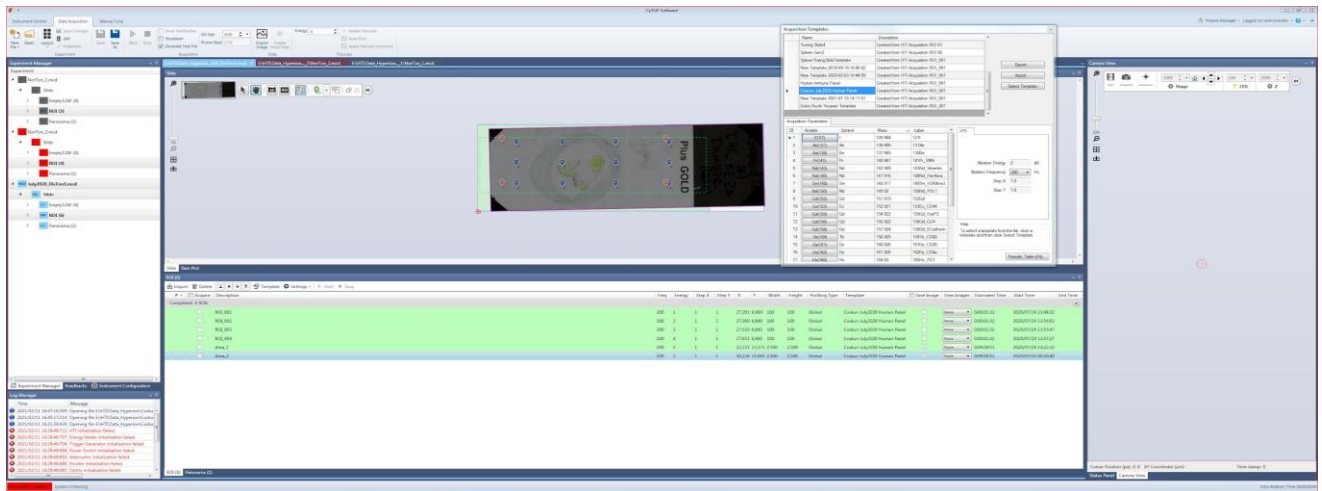

## Diseased Tonsil 2

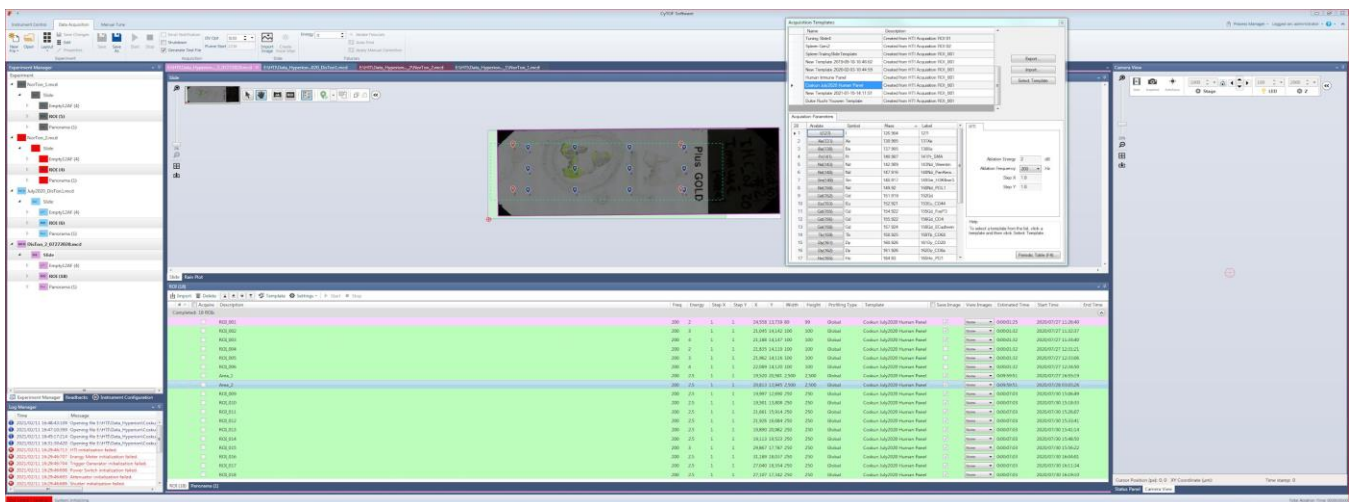

## Diseased Tonsil 3

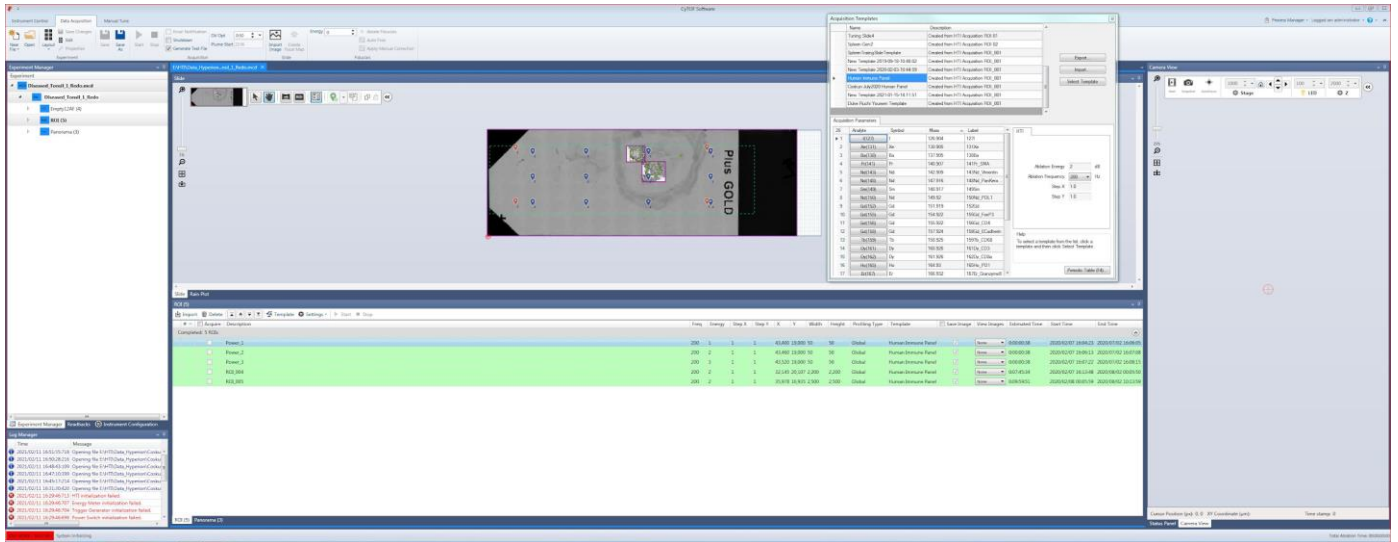

## Open-source Software Notes

The following open-source software was used in the SpatialViz image processing, analysis, and visualization pipelines:

1. SciPy<sup>1</sup>: <http://www.scipy.org>
2. Numpy<sup>2</sup>: <http://www.numpy.org>
3. Matplotlib<sup>3</sup>: <http://www.matplotlib.org>
4. Plotly<sup>4</sup>: <https://plotly.com/python/>
5. Scikit-learn<sup>5</sup>: <http://scikit-learn.org/stable/index.html>
6. Pandas<sup>6</sup>: <https://pandas.pydata.org/>
7. Scikit-image<sup>7</sup>: <http://scikit-image.org/>
8. OpenCV<sup>8</sup>: <https://opencv.org/>
9. ImageJ<sup>9</sup>: <https://imagej.nih.gov/ij/>
10. CellProfiler<sup>10</sup>: <https://cellprofiler.org/>
11. Seaborn<sup>11</sup>: <http://seaborn.pydata.org>
12. NetworkX<sup>12</sup>: <https://networkx.org/>

## References:

1. Jones E., Oliphant E., Peterson P., et al. SciPy: Open Source Scientific Tools for Python, (2001-).
2. Oliphant E. A., Guide to NumPy, Trelgol Publishing (2006)
3. Hunter J. D. Matplotlib: A 2D graphics environment, Computing In Science & Engineering (2007).
4. Sievert, Carson. Interactive Web-Based Data Visualization with R, Plotly, and shiny. CRC Press, (2020).
5. Pedregosa et al., Scikit-learn: Machine learning in Python, Journal of Machine Learning Research 12, 2825-2830 (2011).
6. McKinney W. Data Structures for Statistical Computing in Python. Proceedings of the 9th Python in Science Conference, 51-56 (2010).
7. Van der Walt S. et al., scikit-image: Image processing in Python. PeerJ 2:e453 (2014).
8. Bradski G., The OpenCV Library. Dr. Dobb's Journal of Software Tools (2000).
9. Ruden C.T., et al. ImageJ2: ImageJ for the next generation of scientific image data. BMC Bioinformatics 18:529 (2017).
10. McQuin, C. et al. CellProfiler 3.0: Next-generation image processing for biology. PLOS Biol. 16, e2005970 (2018).
11. Waskom, M. L. Seaborn: statistical data visualization. Journal of Open Source Software, 6(60), 3021, (2021).
12. Hagberg, A. A., Schult, D. A. & Swart, P. J. Exploring Network Structure, Dynamics, and Function using NetworkX. in Proceedings of the 7th Python in Science Conference (eds. Varoquaux, G., Vaught, T. & Millman, J.) 11–15 (2008).
